# Supplementary material for: Husbands’ knowledge and attitudes regarding postpartum depression
Source: PeerJ journal article supplement (doi:10.7717/peerj.19426), 2025-05-13
Supplement: coding_and_scoring.pdf [file coding_and_scoring.pdf]

**Questionnaire on  
Husbands' knowledge and attitudes regarding postpartum  
depression (coding and scoring)**

**Part I: Husbands' Demographic Information:**

**1. Nationality**

- 1) Saudi
- 2) Non-Saudi

**2. Age**

- 1) 20 -29
- 2) 30 -39
- 3) 40 -49
- 4) 50 and more

**3. Region**

- 1) Western region
- 2) Southern region
- 3) Central region
- 4) Eastern region
- 5) Northern region

**4. Education level**

- 1) Primary school
- 2) Intermediate school
- 3) High school
- 4) Bachelor degree / Diploma
- 5) Higher than Bachelor degree

**5. Occupation**

- 1) Government employee
- 2) Private /business
- 3) Free business
- 4) Not working

**6. Monthly family Income**

- 1) Less than 5000 riyals
- 2) 5000-10000 riyals
- 3) More than 10000 riyals

**7. Number of years of marriage?**

- 1) 1 - 3 years
- 2) 4 - 6 years
- 3) More than 6 years

**8. Number of living children:**

- 1) 1 child
- 2) 2 children
- 3) 3 children
- 4) 4 children
- 5) > 5 children

**9. Age of the youngest child?**

- 1) 6 months and less
- 2) 7-12 months
- 3) >1-2 years
- 4) More than 2 years

**10. Gender of the children?**

- 1) Only Males
- 2) Only Females
- 3) Both males and females

**11. Are you satisfied with your children gender?**

- 1) Yes
- 2) No

**Part II: Knowledge about PPD**

**Section 1: Previous information about PPD and experienced with PPD**

**1. You have previous information about postpartum depression?**

- 1) Yes
- 2) No

**2. If yes: What the source of your information?**

- 1) Website
- 2) Physicians/ nurses
- 3) Social media
- 4) Family / friends
- 5) TV /radio interviews
- 6) Others

**3. Had come across women with postpartum depression?**

- 1) Yes
- 2) No

**4. Has your wife ever been diagnosed with postpartum depression before?**

- 1) Yes
- 2) No

## Part II: Knowledge about PPD

### Section 2: Knowledge about Causes and symptoms of PPD.

★ Rating scale: Yes (1) point and No / I don't know (0).

| A. Causes of Postpartum Depression                                     | YES<br>(1)            | NO<br>(0)             | I<br>Don't<br>know<br>(0) |
|------------------------------------------------------------------------|-----------------------|-----------------------|---------------------------|
| 1. Genetic/hereditary                                                  | <input type="radio"/> | <input type="radio"/> | <input type="radio"/>     |
| 2. Crisis situation (Death of loved one, loss of job, divorce) in life | <input type="radio"/> | <input type="radio"/> | <input type="radio"/>     |
| 3. Poor relationship/ marital conflicts                                | <input type="radio"/> | <input type="radio"/> | <input type="radio"/>     |
| 4. History of depression                                               | <input type="radio"/> | <input type="radio"/> | <input type="radio"/>     |
| 5. Lack of family support                                              | <input type="radio"/> | <input type="radio"/> | <input type="radio"/>     |
| 6. Ghost possessed or doing sin or Blackmagic*                         | <input type="radio"/> | <input type="radio"/> | <input type="radio"/>     |
| 7. lack of confidence in taking care of baby                           | <input type="radio"/> | <input type="radio"/> | <input type="radio"/>     |
| 8. Health problem/sickness of baby                                     | <input type="radio"/> | <input type="radio"/> | <input type="radio"/>     |
| 9. Domestic violence/husband violence                                  | <input type="radio"/> | <input type="radio"/> | <input type="radio"/>     |
| 10. Older age (more than 20 years) *                                   | <input type="radio"/> | <input type="radio"/> | <input type="radio"/>     |
| 11. Disappointment with gender of the baby                             | <input type="radio"/> | <input type="radio"/> | <input type="radio"/>     |
| 12. Poverty/financial difficulties                                     | <input type="radio"/> | <input type="radio"/> | <input type="radio"/>     |
| 13. Poor education of the mother                                       | <input type="radio"/> | <input type="radio"/> | <input type="radio"/>     |
| 14. Increased work pressure/stress                                     | <input type="radio"/> | <input type="radio"/> | <input type="radio"/>     |
| 15. Personal strength *                                                | <input type="radio"/> | <input type="radio"/> | <input type="radio"/>     |
| 16. Substance abuse (Alcohol) among husband                            | <input type="radio"/> | <input type="radio"/> | <input type="radio"/>     |
| 17. Single mother                                                      | <input type="radio"/> | <input type="radio"/> | <input type="radio"/>     |
| B. Symptoms of Postpartum Depression                                   | YES<br>(1)            | NO<br>(0)             | I<br>Don't<br>know<br>(0) |
| 1. Feeling sad/miserable                                               | <input type="radio"/> | <input type="radio"/> | <input type="radio"/>     |
| 2. Mother bonding with baby *                                          | <input type="radio"/> | <input type="radio"/> | <input type="radio"/>     |
| 3. Worry about bonding with baby                                       | <input type="radio"/> | <input type="radio"/> | <input type="radio"/>     |

|                                                                   |                       |                       |                       |
|-------------------------------------------------------------------|-----------------------|-----------------------|-----------------------|
| 4. Interested in doing household chores *                         | <input type="radio"/> | <input type="radio"/> | <input type="radio"/> |
| 5. Interested in talking with others *                            | <input type="radio"/> | <input type="radio"/> | <input type="radio"/> |
| 6. Feeling of fatigue/weakness                                    | <input type="radio"/> | <input type="radio"/> | <input type="radio"/> |
| 7. Feeling stressed/anxious                                       | <input type="radio"/> | <input type="radio"/> | <input type="radio"/> |
| 8. Loss of interest/pleasure                                      | <input type="radio"/> | <input type="radio"/> | <input type="radio"/> |
| 9. Sleeping problems                                              | <input type="radio"/> | <input type="radio"/> | <input type="radio"/> |
| 10. Lack of confidence                                            | <input type="radio"/> | <input type="radio"/> | <input type="radio"/> |
| 11. Anger                                                         | <input type="radio"/> | <input type="radio"/> | <input type="radio"/> |
| 12. Weight/appetite changes                                       | <input type="radio"/> | <input type="radio"/> | <input type="radio"/> |
| 13. Irritability                                                  | <input type="radio"/> | <input type="radio"/> | <input type="radio"/> |
| 14. Crying spells for no reason                                   | <input type="radio"/> | <input type="radio"/> | <input type="radio"/> |
| 15. Death wishes                                                  | <input type="radio"/> | <input type="radio"/> | <input type="radio"/> |
| 16. Postpartum depression may occur after birth to 6 months only* | <input type="radio"/> | <input type="radio"/> | <input type="radio"/> |
| <b>Key:</b><br>* <u>Revise coded</u> (Negatively worded)          |                       |                       |                       |

### Part III: Husbands attitudes toward Postpartum Depression

★ Rating scale: Agree (3) point, partly agree (2) and Disagree (1).

| Attitudes towards Postpartum Depression                                                         | Agree<br>(3)          | partly<br>agree<br>(2) | Disagree<br>(1)       |
|-------------------------------------------------------------------------------------------------|-----------------------|------------------------|-----------------------|
| 1. I feel shame and do not tell anyone that my relative has postpartum depression. *            | <input type="radio"/> | <input type="radio"/>  | <input type="radio"/> |
| 2. Postpartum women who have postpartum depression cannot be good mothers. *                    | <input type="radio"/> | <input type="radio"/>  | <input type="radio"/> |
| 3. Postpartum women who have postpartum depression should stay at home. *                       | <input type="radio"/> | <input type="radio"/>  | <input type="radio"/> |
| 4. We should be patient and have empathy with the women who have postpartum depression.         | <input type="radio"/> | <input type="radio"/>  | <input type="radio"/> |
| 5. Postpartum women who have postpartum depression cannot take care of her own children. *      | <input type="radio"/> | <input type="radio"/>  | <input type="radio"/> |
| 6. Postpartum depression is an uncured disease and will continue increasing in severity. *      | <input type="radio"/> | <input type="radio"/>  | <input type="radio"/> |
| 7. Postpartum women who have postpartum depression are a pitiable person.                       | <input type="radio"/> | <input type="radio"/>  | <input type="radio"/> |
| 8. I feel it oppressive to take care of a woman who has postpartum depression. *                | <input type="radio"/> | <input type="radio"/>  | <input type="radio"/> |
| 9. Postpartum women who have postpartum depression cannot make decisions at all. *              | <input type="radio"/> | <input type="radio"/>  | <input type="radio"/> |
| 10. Postpartum women who have postpartum depression should not have another child. *            | <input type="radio"/> | <input type="radio"/>  | <input type="radio"/> |
| 11. I am ready to help if my relative has postpartum depression.                                | <input type="radio"/> | <input type="radio"/>  | <input type="radio"/> |
| 12. Postpartum women who have postpartum depression is a burden to the family. *                | <input type="radio"/> | <input type="radio"/>  | <input type="radio"/> |
| 13. Postpartum women who have postpartum depression should be treated in hospital.              | <input type="radio"/> | <input type="radio"/>  | <input type="radio"/> |
| 14. Postpartum depression is an alert sign that a postpartum woman needs help from a caregiver. | <input type="radio"/> | <input type="radio"/>  | <input type="radio"/> |

|                                                                                          |   |   |   |
|------------------------------------------------------------------------------------------|---|---|---|
| <b>15.</b> If a woman develops postpartum depression, mother and baby to be separated. * | ○ | ○ | ○ |
| <b>16.</b> Postpartum depression does not require any treatment. *                       | ○ | ○ | ○ |
| <b>17.</b> Postpartum depression is common among women.                                  | ○ | ○ | ○ |
| <b>18.</b> Breast feeding to be stopped if a woman develops postpartum depression. *     | ○ | ○ | ○ |
| <b>19.</b> Woman with postpartum depression have a high risk of committing suicide. *    | ○ | ○ | ○ |
| <p><b><u>Key:</u></b></p> <p><b><u>* Revise coded</u> (Negatively worded)</b></p>        |   |   |   |
