# Supplementary material for: Husbands’ knowledge and attitudes regarding postpartum depression
Source: PeerJ. 2025 May 13;13:e19426. doi: 10.7717/peerj.19426 (PMC12083466; doi:10.7717/peerj.19426)
Supplement: Supplemental Information 1 [file peerj-13-19426-s001.xlsx]

## Sheet: Sheet 1
Nationality	Age	Region	Education level	Occupation	Monthly family Income	Number of years of marriage	Number of living children	Age of the youngest child	Gender of the children	Are you satisfied with your children gender	You have information about postpartum depression	If yes: What the source of your information	Had come across women with postpartum depression	Has your wife ever been diag1sed with postpartum depression before	Causes of Postpartum Depression:1. Genetic/hereditary	2.Crisis situation (Death of loved one, loss of job, divorce) in life	3.Poor relationship/ marital conflicts	4.History of depression	5.Lack of family support	6.Ghost possessed or doing sin or Blackmagic	7.lack of confidence in taking care of baby	8.Health problem/sickness of baby	9.Domestic violence/husband violence	10.Older age (more than 20 years)	11.Disappointment with gender of the baby	12.Poverty/financial difficulties	13.Poor education of the mother	14.Increased work pressure/stress	15.Personal strength	16.Substance abuse (Alcohol) among husband	17.Single mother	B. Symptoms of Postpartum Depression: 1.Feeling sad/miserable	2.Mother bonding with baby *	3.Worry about bonding with baby	4.Interested in doing household chores	5.Interested in talking with others	6.Feeling of fatigue/weakness	7.Feeling stressed/anxious	8.Loss of interest/pleasure	9.Sleeping problems	10.Lack of confidence	11.Anger	12.Weight/appetite changes	13.Irritability	14.Crying spells for 1 reason	15.Death wishes	16.Postpartum depression may occur after birth to 6 months only	1. I feel shame and do 1t tell anyone that my relative has PPD	2. Postpartum women who have PPD can1t be good mothers. *
1	3	2	4	1	3	3	5	1	3	2	1		2	2	0	0	0	0	0	1	0	0	0	1	0	0	0	0	1	0	0	0	1	0	1	1	0	0	0	0	0	0	0	0	0	0	1	3	1
1	1	1	5	3	3	2	5	3	1	1	2	4	2	1	0	1	1	0	1	0	1	1	0	0	0	0	1	0	0	0	0	1	0	1	0	0	1	1	1	1	1	1	1	1	1	1	0	1	1
1	3	1	5	1	3	3	5	3	3	2	2	3	2	2	0	1	1	1	0	1	1	0	0	1	0	1	0	1	0	0	0	1	0	1	1	1	1	1	0	1	0	0	0	0	0	0	1	3	1
1	2	1	4	1	2	3	4	2	3	2	2	1, 4, 5	1	1	0	1	1	0	1	0	1	1	1	1	0	0	0	1	1	1	0	1	0	0	0	1	0	0	0	0	1	0	0	0	0	0	1	1	1
1	2	1	4	1	2	3	3	4	3	2	2	3	1	1	0	1	1	1	1	1	0	1	1	1	0	1	0	0	1	1	1	1	0	1	0	0	1	1	1	1	1	1	1	1	1	1	0	2	3
1	4	3	1	1	2	1	1	1	1	2	2	6	2	2	1	1	1	1	1	0	1	1	1	0	1	1	1	1	0	1	1	1	0	1	0	0	1	1	1	1	1	1	1	1	1	1	0	3	1
1	3	1	4	1	3	3	4	4	3	2	2	3, 4, 2, 5	1	1	0	0	0	0	0	1	0	0	0	1	0	0	0	0	1	0	0	0	1	0	1	1	0	0	0	0	0	0	0	0	0	0	1	2	1
1	3	3	5	1	3	3	4	4	3	2	2	2	2	2	0	1	1	1	1	1	1	1	1	0	1	1	1	1	1	1	1	1	0	1	0	0	1	1	1	1	1	1	1	1	1	1	1	1	2
1	2	1	3	2	2	3	4	3	3	2	2	4, 1, 5	1	2	0	1	1	1	0	1	0	0	1	0	0	1	0	1	0	0	0	1	1	1	0	0	1	1	1	1	1	1	1	1	1	1	0	3	1
1	2	1	4	1	3	3	2	3	2	2	2	3	1	1	0	1	1	1	1	0	1	1	1	0	1	1	1	1	0	1	1	1	0	1	1	1	0	1	1	1	1	1	1	1	1	1	1	1	1
2	2	2	3	2	1	3	3	1	3	2	2	2, 3, 1	1	1	0	0	0	0	0	1	0	0	0	0	0	1	0	1	1	0	0	0	1	0	0	1	1	0	0	0	0	0	1	1	0	0	1	3	3
1	2	1	3	1	2	3	5	1	3	2	1		1	1	0	0	1	0	0	1	0	0	1	0	0	1	0	1	1	0	0	0	1	1	0	1	1	1	0	1	0	1	0	0	1	0	1	1	3
1	1	3	3	1	2	1	1	2	1	2	2	3, 4	1	2	0	0	1	0	1	1	0	1	0	0	0	1	0	0	0	0	0	1	0	1	0	1	1	1	1	0	1	1	0	1	0	0	1	2	3
1	2	1	4	2	2	3	3	1	3	2	2	3, 4, 6	1	1	0	0	0	0	1	1	1	0	1	0	1	0	1	1	1	1	0	1	0	1	0	0	1	1	1	1	1	1	1	1	1	1	0	3	3
1	2	1	4	1	3	2	2	3	3	2	2	4	1	1	0	0	0	0	0	1	0	0	0	1	0	0	0	0	1	0	0	0	1	0	1	1	0	0	0	0	0	0	0	0	0	0	1	2	3
1	2	1	4	1	2	2	2	3	2	2	2	3	1	1	1	1	1	1	1	1	0	1	0	0	1	1	1	1	1	1	0	1	0	1	0	0	1	1	0	1	0	1	1	0	1	1	0	2	1
1	2	1	5	1	3	3	2	4	3	2	1		2	2	1	1	1	1	1	0	1	1	1	0	1	1	1	1	0	1	1	1	0	1	0	0	1	1	1	1	1	1	1	1	1	1	0	3	3
1	3	1	5	1	3	3	4	4	3	2	1		1	1	0	0	0	0	0	1	0	0	0	1	0	0	0	0	1	0	0	0	1	0	1	1	0	0	0	0	0	0	0	0	0	0	1	2	2
2	4	1	4	3	2	3	4	4	3	2	2	1, 3, 2	1	1	0	1	1	0	1	0	1	1	1	1	0	1	1	1	1	1	1	1	0	0	0	0	0	1	1	1	0	1	1	1	0	0	0	1	2
1	1	1	4	1	3	1	1	3	2	2	2	4, 5, 3, 2	2	1	1	0	1	0	1	0	1	1	1	1	1	1	1	1	0	1	1	1	0	1	0	0	1	1	1	1	1	1	1	1	1	1	0	1	1
1	3	2	3	2	1	3	4	4	3	2	1		1	1	0	1	1	1	1	0	1	1	1	0	0	1	1	1	1	1	1	1	1	0	1	1	1	1	1	1	1	1	1	1	1	0	1	2	2
1	3	1	4	1	3	3	3	4	3	2	2	1, 2	2	1	0	0	1	0	1	1	1	1	1	0	1	0	1	0	1	0	1	0	1	0	1	1	1	1	1	1	1	1	1	0	0	0	1	2	3
1	2	1	4	1	3	3	2	4	3	2	2	2	2	2	0	1	1	1	1	1	1	0	0	1	0	0	0	0	1	0	0	1	1	1	1	1	0	1	1	1	1	1	1	1	1	1	1	1	2
1	1	2	4	1	2	2	1	4	2	2	2	4	1	1	0	0	0	0	1	0	1	0	0	0	1	1	0	0	1	0	0	1	0	1	1	0	1	0	0	0	0	1	0	0	0	0	1	3	2
1	3	1	3	4	1	3	5	4	1	2	2	6	1	1	0	0	0	0	0	1	0	0	0	1	0	0	0	0	1	0	0	0	1	0	1	1	0	0	0	0	0	0	0	0	0	0	1	1	2
1	2	1	4	1	2	2	2	4	2	2	2	1, 4, 3	1	1	0	0	0	1	1	1	1	1	0	1	0	0	0	0	1	0	0	0	1	0	1	1	0	0	0	0	0	0	0	0	0	0	1	2	1
1	3	1	4	2	2	3	4	3	3	2	2	4	1	1	0	0	1	1	1	1	0	0	1	1	1	1	0	1	1	0	1	1	0	1	1	1	1	1	1	1	1	1	1	1	1	0	0	1	1
1	2	1	4	1	3	2	1	1	2	2	1		1	1	0	0	0	0	0	1	0	0	1	1	0	0	0	0	1	0	0	1	1	0	0	1	0	0	0	0	0	0	0	0	0	0	1	2	2
1	3	1	4	1	2	3	5	4	3	2	1		1	1	0	0	0	0	0	1	0	0	0	1	0	0	0	0	1	0	0	1	0	1	1	1	1	1	1	1	1	1	1	1	1	1	1	2	3
1	2	1	3	1	2	3	2	4	3	2	1		1	1	0	1	1	1	1	1	0	1	1	1	1	1	1	1	0	1	1	1	1	0	1	1	1	1	1	1	1	1	1	1	1	1	1	2	2
1	2	1	4	1	3	3	2	4	3	2	2	6, 3, 4	1	1	0	0	1	0	1	1	0	0	1	1	0	1	0	0	1	0	0	0	1	0	0	1	0	1	1	1	1	1	1	1	0	0	1	2	2
1	4	1	3	1	3	3	5	4	3	2	2	4	2	1	0	1	0	0	0	1	1	0	0	0	1	1	1	1	0	1	1	1	0	1	0	0	1	1	1	1	1	1	1	1	1	1	0	2	2
1	2	1	4	1	3	2	1	4	1	2	2	1	2	2	0	0	1	0	0	0	0	0	0	0	0	1	0	1	0	0	0	1	1	0	1	1	1	1	1	1	1	1	1	1	1	1	0	2	1
1	2	1	4	1	3	2	3	2	3	2	2	1	2	1	0	1	1	1	1	0	0	1	1	1	0	0	1	0	1	1	1	1	0	1	0	1	0	0	1	1	0	0	1	1	1	1	1	1	3
1	1	5	4	2	2	2	2	2	1	2	2	1, 3	2	2	0	1	1	1	0	1	1	1	0	0	0	1	0	1	0	0	0	1	0	1	0	0	1	1	0	1	1	1	1	1	1	0	0	3	2
1	1	1	4	1	3	1	1	1	1	2	2	4, 1, 5	1	1	0	0	0	0	0	1	0	0	0	1	0	0	0	0	1	0	0	1	1	0	1	1	0	0	0	0	0	0	0	0	0	0	1	2	3
1	2	1	4	1	3	3	2	3	3	2	2	3, 4, 2	2	1	0	1	1	1	1	0	1	1	1	1	0	1	1	1	1	1	1	1	0	0	1	1	1	1	0	1	1	1	0	0	1	1	0	1	3
1	1	1	4	2	2	1	1	1	1	2	2	3	1	1	0	0	1	0	1	1	1	0	0	1	0	1	1	0	1	1	0	1	0	1	1	1	1	1	0	1	0	1	0	1	1	1	1	3	2
1	3	1	4	1	3	3	5	1	3	2	2	4	2	1	0	0	0	0	1	1	0	0	0	1	0	0	0	0	1	1	0	1	1	0	1	1	1	1	1	1	0	1	0	1	1	0	0	3	1
1	3	3	5	1	2	3	5	4	3	2	2	1	2	2	1	1	1	1	1	1	0	1	1	0	0	1	0	1	1	0	0	1	0	1	0	0	1	1	1	1	1	1	1	1	1	1	1	1	3
1	2	1	4	1	3	3	2	4	2	2	2	5	2	1	0	0	1	0	1	0	1	0	1	1	0	1	1	1	1	1	0	1	1	1	0	1	1	1	1	1	1	1	1	1	1	0	1	3	3
1	2	1	4	2	3	2	1	3	1	2	2	3	2	2	0	0	1	0	1	1	1	0	1	1	1	0	1	0	0	1	0	1	0	1	1	1	0	1	1	1	1	1	0	1	1	0	0	2	1
1	3	1	3	1	2	2	5	4	3	2	2	2	1	1	0	1	1	1	1	1	1	1	1	0	1	1	0	1	0	1	0	1	0	1	1	1	1	1	1	1	1	1	1	1	1	1	0	1	3
1	1	4	3	1	3	3	3	4	2	1	1		1	1	0	0	0	0	1	1	0	1	0	0	0	0	0	0	1	0	0	1	1	1	1	1	1	1	1	1	1	1	1	1	1	1	1	1	2
1	2	1	4	1	3	3	4	4	3	2	2	1	1	1	1	1	1	1	1	1	1	1	1	1	0	1	0	1	0	1	1	1	0	1	0	1	1	1	1	1	1	1	1	1	1	1	0	3	3
1	2	1	4	2	1	3	1	1	2	2	2	3, 4, 2, 5, 1	1	1	0	0	1	1	1	1	0	0	0	1	0	1	0	1	0	0	0	1	1	1	1	1	1	1	0	1	1	0	1	1	0	0	1	1	3
1	2	1	4	1	3	3	4	2	1	2	2	3, 4, 1	1	1	0	1	1	1	1	0	1	1	1	0	0	1	1	1	0	1	1	1	1	1	1	1	1	1	1	1	1	1	1	1	1	1	1	3	2
1	4	1	3	3	2	3	5	4	3	2	2	1	1	1	0	0	0	0	1	1	0	0	0	1	0	0	0	0	1	0	0	0	1	0	1	1	0	0	0	0	0	0	0	0	0	0	1	2	3
1	2	1	3	1	2	3	2	4	1	2	1		2	1	0	0	1	1	1	0	1	1	1	1	0	1	0	1	0	1	1	1	1	1	0	1	1	1	1	1	1	1	0	1	1	1	0	1	3
1	4	4	4	2	3	3	5	4	3	2	2	4	2	1	0	1	1	1	1	0	1	1	1	1	1	1	1	1	1	1	1	1	0	1	0	1	1	1	1	1	1	0	1	1	1	1	0	2	3
1	1	1	3	2	2	1	1	3	1	2	2	2, 4, 3, 5	1	1	0	0	1	0	1	1	0	0	1	1	0	1	0	1	1	1	1	1	0	1	0	0	1	1	1	1	0	1	1	1	1	0	0	1	3
1	3	1	4	3	3	3	3	4	3	2	1		2	2	0	1	0	0	1	1	1	1	1	1	0	1	1	1	1	1	1	1	0	1	0	1	1	1	1	1	1	1	1	1	1	1	1	2	2
1	2	1	3	1	2	3	3	4	1	2	1		2	2	0	0	0	0	0	1	0	1	0	0	0	1	0	0	0	0	0	0	0	1	0	1	0	1	0	0	0	0	0	0	0	0	1	3	3
1	2	1	3	2	2	3	2	4	2	2	2	3	1	1	0	0	1	0	1	1	1	0	0	1	0	0	0	1	1	0	0	1	1	0	0	1	1	1	1	1	1	1	0	1	1	1	0	2	2
1	2	4	3	1	2	3	4	4	3	2	2	3	1	1	0	0	1	0	1	0	1	1	1	1	1	1	1	1	1	0	1	1	1	1	0	1	1	1	1	1	1	1	1	1	1	1	1	2	3
1	1	2	4	1	2	1	2	2	3	2	2	1	1	2	0	1	1	1	0	1	0	0	0	0	0	0	0	1	0	0	0	1	0	1	0	0	1	1	1	1	1	1	1	1	1	1	0	3	1
1	3	1	4	2	3	3	3	4	3	2	2	1, 3	2	1	0	0	0	0	1	0	1	1	1	1	0	0	0	1	1	1	1	1	1	0	1	1	1	1	1	1	1	1	1	1	1	1	1	2	3
1	2	2	3	1	2	2	2	3	3	2	2	2	1	1	0	0	0	0	0	1	0	0	0	0	0	0	0	0	0	0	0	0	0	1	0	0	1	1	1	1	0	1	1	1	1	0	0	3	2
1	4	1	5	1	3	3	2	4	1	2	1		1	1	0	0	0	0	0	1	0	0	0	1	0	0	0	0	1	0	0	0	1	0	1	1	0	0	0	0	0	0	0	0	0	0	1	3	3
1	4	1	5	1	3	3	4	4	3	2	2	6, 2	2	2	0	0	1	0	1	0	1	1	1	1	1	0	0	1	1	1	1	1	0	0	1	1	1	1	1	1	1	1	1	1	1	1	0	3	2
1	2	1	4	2	3	3	1	4	2	2	2	4	2	1	0	0	0	0	1	1	0	0	0	1	0	0	0	1	1	0	0	1	0	1	1	1	1	1	1	1	1	1	0	1	1	1	0	3	3
1	2	1	4	1	2	2	1	4	1	2	1		1	1	1	1	1	1	1	0	1	1	1	1	1	1	0	1	1	1	1	1	1	1	0	1	1	1	1	1	1	1	1	1	1	1	0	3	2
1	2	1	4	1	3	3	2	3	1	2	1		2	1	1	1	1	1	1	1	1	1	1	1	1	1	0	1	1	1	1	1	1	0	1	1	1	1	1	1	1	1	1	1	1	1	1	3	2
1	2	2	4	1	2	3	4	2	3	2	2	4, 6, 3	1	1	0	1	1	1	1	0	1	1	1	1	1	1	1	1	1	1	1	1	1	1	0	0	1	1	1	1	1	1	0	1	1	1	0	1	2
1	3	1	4	1	2	3	2	4	1	2	2	4	1	1	0	1	1	0	1	0	1	0	1	1	0	0	0	0	1	1	1	1	1	1	1	1	1	1	1	1	1	1	1	1	1	0	1	1	2
1	2	3	4	2	1	1	1	4	1	2	1		1	1	0	0	0	0	0	1	0	0	0	1	0	0	0	0	1	0	0	0	1	0	1	1	0	0	0	0	0	0	0	0	0	0	1	3	3
1	4	4	4	4	3	3	2	4	1	2	1		1	1	0	0	0	0	0	1	0	0	0	1	0	0	0	0	1	0	1	0	0	1	1	1	0	0	0	0	0	0	1	1	1	1	1	2	3
1	4	1	4	3	2	3	3	4	3	2	1		1	1	0	1	1	0	0	1	0	1	1	1	0	1	0	1	1	1	0	0	1	0	1	1	0	0	0	0	0	1	1	1	1	0	1	2	3
1	4	1	4	1	3	3	5	4	3	2	2	2, 4, 1	1	1	0	0	0	0	0	1	0	0	0	1	0	0	0	0	1	0	0	0	1	0	1	1	0	0	0	0	0	0	0	0	0	0	1	3	3
1	2	2	3	2	1	2	2	3	3	1	2	3	1	1	0	1	1	0	0	1	0	0	0	1	0	0	0	0	1	0	0	1	1	1	1	1	1	1	1	1	1	1	1	1	1	0	1	3	2
1	1	2	3	1	1	1	1	3	2	2	2	4, 2	2	2	1	1	1	0	1	1	1	0	0	1	0	1	0	0	1	0	0	1	0	0	1	1	1	1	0	1	0	1	1	1	1	0	0	3	1
1	2	1	4	2	3	3	3	3	3	2	1		1	1	0	0	0	0	1	1	0	0	0	0	0	0	1	1	1	1	1	1	1	0	1	1	1	1	0	1	0	1	0	1	1	0	1	2	2
1	2	1	4	2	3	3	1	4	2	2	2	4, 2	2	1	0	0	1	1	1	1	1	1	1	0	1	1	1	1	0	1	1	1	0	1	0	0	1	1	1	1	1	1	1	1	1	1	0	2	3
1	3	1	5	1	3	3	4	4	2	2	1		1	1	0	0	0	0	0	1	0	0	0	1	0	0	0	0	1	0	0	0	1	0	1	1	0	0	0	0	0	0	0	0	0	0	1	3	3
1	2	1	4	1	2	2	1	4	1	2	1		2	1	1	0	0	0	1	1	1	0	0	0	1	0	0	1	0	0	0	1	1	1	1	1	1	1	1	1	0	1	1	1	1	1	1	3	2
1	2	1	3	1	2	2	2	4	1	1	2	4	2	1	0	0	0	0	0	1	1	1	0	1	0	0	0	1	1	0	0	1	0	0	0	1	1	1	1	1	1	1	1	1	1	1	0	2	3
1	2	1	4	1	3	2	1	4	2	2	1		2	1	0	1	1	1	1	0	1	1	1	0	1	1	1	1	0	1	1	1	0	1	0	0	1	1	1	1	1	1	1	1	1	1	0	2	3
1	1	2	4	1	1	2	2	4	2	2	2	1, 3	1	1	0	0	0	0	0	1	0	0	0	1	0	0	0	0	1	0	0	0	1	0	1	1	0	0	0	0	0	0	0	0	0	0	1	2	3
1	2	2	3	1	2	2	1	3	1	2	2	1, 6, 5, 3, 4	1	1	0	0	1	0	1	1	0	0	0	1	0	0	0	0	1	0	0	1	1	0	1	1	0	0	0	0	0	1	1	0	0	0	1	2	3
1	2	2	3	2	2	3	3	3	1	1	2	5, 3, 1	2	1	0	0	0	0	0	1	1	0	0	1	0	0	0	0	1	0	0	1	0	0	1	1	1	0	0	0	0	0	0	0	0	0	1	3	2
1	2	1	4	1	3	3	5	3	3	2	2	2, 3, 1	1	2	0	0	0	0	0	1	0	0	0	0	0	0	0	0	1	0	0	0	1	0	1	1	1	0	0	0	0	0	0	0	0	0	0	3	2
1	4	1	4	3	3	3	5	4	3	1	1		1	1	0	0	0	0	1	1	0	1	0	1	0	0	0	1	1	0	0	0	1	0	1	1	0	0	0	0	0	0	0	0	1	1	1	3	3
2	1	1	3	2	1	1	1	2	1	2	2	3, 2, 1, 4	1	1	0	0	0	0	0	1	0	0	0	1	0	0	0	0	1	0	0	0	1	0	1	1	0	0	0	0	0	0	0	0	0	0	1	2	3
1	3	1	3	1	3	3	3	4	1	2	1		1	1	0	0	1	0	1	0	0	0	1	0	0	1	0	1	1	0	0	0	1	0	1	1	1	1	1	1	0	1	1	1	1	0	1	1	3
1	2	1	3	2	1	1	1	2	1	2	2	6	1	1	0	0	0	0	0	1	0	0	0	1	0	0	0	0	1	0	0	0	1	0	1	1	0	0	0	0	0	0	0	0	0	0	1	3	3
1	3	1	1	2	1	3	5	3	3	2	2	5, 3	1	1	0	0	0	0	0	1	0	0	0	1	0	0	0	0	1	0	0	0	1	0	1	0	1	1	1	0	1	1	1	1	1	0	0	3	3
1	3	1	4	1	2	2	2	2	1	2	2	1	1	1	1	1	1	1	1	0	1	1	1	1	0	0	0	1	1	1	1	0	0	1	0	1	0	0	0	0	1	1	1	1	1	0	1	3	3
2	1	4	2	3	1	2	3	3	1	2	2	3	1	1	0	1	1	0	1	0	0	0	1	1	0	1	0	1	1	1	1	0	0	0	1	1	0	0	0	1	0	1	1	0	1	1	1	3	3
1	2	2	4	1	3	3	1	4	2	2	2	2	2	2	0	1	1	1	0	0	0	0	1	1	1	0	0	1	0	1	1	1	0	1	1	1	1	1	1	1	1	1	1	1	1	1	1	2	3
1	2	2	5	1	3	1	1	1	2	2	1		2	2	0	0	0	0	1	1	1	0	0	0	0	0	0	0	1	0	0	1	0	1	1	1	0	1	0	1	1	1	1	1	1	0	0	3	1
1	2	1	5	1	3	3	3	2	3	2	2	6, 4, 2, 3	1	1	0	1	1	1	1	1	1	1	1	1	0	0	0	1	1	1	1	1	1	1	1	1	1	1	1	1	1	1	1	1	1	0	1	2	2
1	2	3	3	1	2	2	1	1	2	2	2	4	1	1	0	1	1	1	1	1	1	0	1	1	0	1	0	1	1	0	1	1	0	0	0	1	1	1	1	0	1	0	0	1	0	0	0	2	3
1	2	1	4	1	3	2	2	4	3	2	2	4, 3	1	1	0	0	0	0	0	1	0	0	0	1	0	0	0	0	1	0	0	0	1	0	1	1	0	0	0	0	0	0	0	0	0	0	1	3	3
1	2	1	3	1	2	3	3	4	3	2	1		1	1	0	0	0	0	0	1	0	0	0	1	0	0	0	0	1	0	0	0	1	0	1	1	0	0	0	0	0	0	0	0	0	0	1	3	3
1	2	1	4	2	2	3	3	4	3	2	2	5, 3	1	1	0	0	0	0	0	1	0	0	0	1	0	0	0	0	1	0	0	0	1	1	1	1	0	0	0	0	0	0	0	0	1	0	1	1	3
1	2	1	4	1	2	3	2	4	1	2	1		1	1	1	1	0	1	1	0	1	1	1	1	0	1	1	1	1	1	1	1	1	1	1	1	1	1	1	1	1	1	1	1	1	1	0	3	2
1	3	1	4	2	1	3	5	3	3	2	2	4	2	1	0	0	0	0	1	1	0	1	0	1	0	1	0	1	1	1	0	1	1	0	0	1	0	1	0	1	1	0	0	0	0	0	0	2	3
1	1	1	4	1	2	1	3	2	3	2	2	2	2	1	0	0	0	1	1	1	1	1	1	1	1	1	1	1	1	1	1	1	1	0	1	1	1	1	1	1	1	1	1	1	1	1	1	3	2
1	4	1	4	1	3	3	5	4	3	2	2	3	2	1	0	0	0	0	1	1	0	1	1	1	0	1	1	1	1	1	1	1	0	1	1	1	0	1	1	1	1	1	1	1	1	0	1	2	3
1	2	5	3	1	2	1	1	2	2	2	2	2	1	1	0	1	1	0	1	1	0	1	1	0	0	0	0	0	1	0	0	1	0	0	1	0	1	0	0	0	1	0	1	0	0	0	1	3	2
1	3	1	4	1	3	3	5	3	3	2	2	4, 5, 3	2	1	0	1	0	1	0	0	1	1	1	1	1	0	1	1	1	0	1	1	0	1	1	1	1	1	0	1	1	1	1	1	1	0	0	3	2
1	2	2	4	1	3	3	4	3	2	1	2	1, 4	2	1	0	0	0	0	1	1	0	0	0	1	0	1	0	1	1	1	0	1	0	1	0	1	1	1	1	1	1	1	1	1	1	1	0	1	3
1	3	1	4	1	2	3	5	4	3	2	2	2	2	1	1	0	1	0	1	1	0	0	1	1	0	0	1	1	1	1	1	1	0	1	1	1	1	1	1	1	1	1	1	1	1	1	0	2	3
1	2	1	5	2	2	2	3	4	3	2	1		1	1	0	1	1	1	1	1	0	0	0	1	0	0	0	0	1	0	0	1	1	0	1	1	0	1	1	1	1	0	1	0	1	1	1	2	3
1	1	2	3	1	2	1	1	3	2	2	1		1	1	0	1	1	1	1	0	1	1	1	1	0	1	1	1	1	1	1	1	0	1	1	1	0	1	1	1	1	1	1	1	1	1	1	2	2
1	1	1	4	1	3	1	1	1	1	2	1		1	1	0	0	0	0	0	0	0	1	0	0	0	0	0	1	1	0	1	1	0	1	1	0	1	1	1	1	0	0	1	0	0	0	1	2	3
1	1	3	4	1	2	2	1	4	1	2	1		2	2	0	1	0	0	1	1	1	0	1	1	1	1	0	1	1	1	1	1	0	1	0	1	1	1	1	1	1	1	1	1	1	1	1	3	3
1	2	1	4	2	3	1	1	1	2	2	2	3, 1, 2	1	1	1	0	1	0	0	1	1	1	0	1	0	0	0	1	1	0	0	0	1	1	0	1	1	1	0	1	0	0	0	0	0	0	1	2	3
1	3	1	4	1	3	3	3	1	2	2	2	2	1	1	0	1	0	1	1	1	1	1	1	1	1	1	1	1	1	1	1	1	1	1	0	0	1	1	1	1	1	1	1	1	1	1	1	2	3
1	2	4	3	2	2	3	2	4	2	2	2	3	2	1	0	0	1	0	1	1	1	1	0	1	0	1	0	1	1	0	1	1	1	1	0	1	1	1	1	1	1	1	1	1	1	1	1	2	3
1	1	4	3	1	2	2	2	2	3	2	2	2	1	1	1	1	1	0	0	1	0	0	1	1	0	0	0	0	1	1	0	1	1	0	1	1	0	0	0	0	1	0	1	1	1	1	1	3	3
2	2	1	3	2	1	2	2	1	3	2	2	3	2	1	0	0	0	1	1	1	0	1	0	1	0	1	1	0	1	0	0	1	1	1	1	0	1	1	1	1	1	1	1	0	1	1	0	1	3
1	2	1	4	1	2	2	2	2	1	2	2	3, 1	2	1	0	0	0	0	1	1	0	1	0	1	0	1	0	0	1	1	1	1	1	1	1	1	1	1	1	1	1	1	1	1	1	0	1	1	3
1	3	1	4	1	3	3	3	2	3	2	2	2	1	1	0	0	1	0	0	1	1	1	1	1	1	1	0	1	0	1	1	1	0	1	0	0	1	1	1	1	1	1	1	1	1	1	0	2	3
2	1	1	4	2	2	1	1	1	2	2	1		1	1	0	0	1	0	1	1	0	0	0	1	0	0	0	0	1	1	0	1	1	0	1	1	0	0	0	0	0	0	0	0	1	1	1	3	2
2	2	1	3	2	2	3	3	4	3	2	1		1	1	1	0	1	1	1	0	1	1	1	0	1	1	0	1	1	1	1	1	0	1	0	1	1	1	1	1	1	1	1	1	1	1	1	1	3
1	2	1	4	1	3	2	2	3	3	2	2	6	2	1	0	1	1	1	1	0	1	1	1	1	0	0	0	0	1	0	0	1	1	0	1	1	0	1	1	0	0	0	1	0	1	1	0	2	3
1	2	1	4	1	3	2	2	3	3	2	2	5, 3, 2	2	1	0	1	1	1	1	0	1	1	1	1	0	0	0	0	1	0	0	1	1	0	1	1	0	1	1	0	0	0	1	0	1	1	0	2	3
2	1	1	4	2	2	3	4	2	3	2	2	4, 2	2	1	0	0	1	0	0	1	0	0	0	0	0	1	0	1	0	0	0	1	0	1	0	1	1	0	0	1	1	1	1	1	0	0	1	2	3
1	2	1	3	2	2	3	3	4	3	2	1		2	1	0	1	1	1	1	0	1	1	1	1	1	1	1	1	1	1	1	1	1	0	0	1	1	1	1	1	1	1	1	0	1	1	0	2	3
1	3	3	4	2	3	3	4	1	3	2	2	1, 3, 4	2	2	0	1	1	0	0	1	1	0	0	1	0	0	0	0	1	0	1	1	1	1	1	1	0	1	0	0	1	1	0	1	0	0	0	2	1
1	3	1	4	1	3	3	4	4	1	2	1		2	1	1	0	1	0	0	1	1	1	0	0	1	0	0	1	0	1	1	1	0	1	1	0	1	1	0	1	0	0	0	1	1	1	0	1	2
1	4	4	4	1	3	3	4	4	2	2	2	1	2	1	0	0	0	0	0	1	0	0	0	1	0	0	0	0	1	0	0	1	1	0	1	1	1	1	1	1	1	1	0	0	1	1	1	2	3
1	2	1	4	1	3	3	3	4	3	2	2	2, 4	1	1	0	0	1	1	1	0	1	1	1	0	1	1	1	1	0	1	1	1	0	1	0	0	1	1	1	1	1	1	1	1	1	1	0	3	2
1	2	5	4	1	1	2	2	2	3	2	1		2	2	0	1	1	1	1	1	1	1	1	0	1	1	0	1	1	1	1	1	0	1	1	1	1	1	1	1	1	1	1	1	1	1	1	3	1
1	4	1	4	1	3	3	5	4	3	2	1		1	1	0	0	0	0	0	1	0	0	0	1	0	0	0	0	1	0	0	0	1	0	1	1	0	0	0	0	0	0	0	0	0	0	1	3	3
1	2	1	3	3	2	3	3	4	3	2	1		1	1	0	0	0	0	1	1	1	0	1	0	1	0	1	1	1	1	1	1	1	1	1	1	1	1	1	1	1	1	1	1	1	1	0	3	3
1	1	2	3	1	2	2	2	2	3	2	1		1	1	0	1	1	0	0	1	0	0	0	0	1	0	0	0	0	0	1	1	0	0	0	1	1	0	0	0	1	1	1	1	1	1	0	3	3
1	2	1	5	2	3	3	1	4	2	2	1		2	1	0	0	1	1	1	1	1	1	1	0	0	1	0	1	1	1	1	1	0	1	1	1	1	1	1	1	1	1	1	1	1	0	1	2	3
1	2	2	4	1	2	3	2	4	3	2	2	2, 1	1	1	0	0	1	1	1	1	1	1	1	1	0	1	1	1	1	1	1	0	1	0	0	0	1	1	1	1	1	1	1	1	1	1	0	3	3
1	1	1	4	2	2	1	1	3	2	2	1		2	1	1	1	1	1	1	1	1	1	1	1	0	1	0	1	1	1	1	1	1	0	1	1	1	1	1	1	1	1	1	0	1	1	1	3	3
1	3	1	5	1	3	3	4	2	3	2	2	1, 4, 2, 5, 3	2	1	0	0	1	1	1	1	1	1	1	1	0	1	1	1	1	1	1	1	1	0	0	1	1	1	1	1	1	1	1	1	1	1	0	2	3
1	3	1	4	1	2	3	2	4	3	2	2	3, 4	2	1	0	1	0	0	0	0	1	1	1	0	1	1	0	1	0	1	0	1	0	1	0	0	1	1	1	1	1	1	1	1	1	0	1	2	3
1	2	1	3	1	1	2	3	4	2	2	1		1	1	0	0	0	0	0	1	0	0	0	1	0	0	0	0	1	0	0	0	1	1	1	1	0	0	0	0	0	0	0	0	0	0	1	3	3
1	2	1	5	1	2	3	4	3	2	2	2	4, 5, 3	1	1	0	0	0	1	1	1	1	0	1	1	1	1	0	1	1	0	0	1	1	1	1	1	0	1	1	1	1	1	1	1	1	1	0	2	1
1	1	2	3	1	2	1	1	2	2	2	2	4	1	1	0	0	1	0	1	0	1	0	1	1	0	0	0	0	1	0	0	1	1	0	1	1	1	1	1	1	1	1	1	1	1	0	1	3	3
1	4	1	5	4	3	3	5	4	3	2	2	2	2	2	0	0	0	0	0	1	0	0	1	0	1	0	0	1	1	0	0	1	1	0	1	1	1	1	1	1	1	0	1	0	1	1	1	3	2
1	2	3	4	2	3	3	2	4	3	2	2	6	2	1	0	1	1	1	1	1	1	1	1	1	1	1	1	1	1	1	1	1	0	1	1	1	0	1	1	0	1	1	1	1	1	1	1	3	3
1	2	1	4	1	3	3	5	1	3	2	1		1	1	0	1	1	1	1	0	1	1	1	1	0	1	0	1	0	1	1	1	1	1	1	1	1	1	1	1	1	1	1	1	1	1	1	2	3
1	4	1	3	3	3	3	5	2	3	2	1		2	1	0	1	1	1	1	0	1	1	1	0	1	1	1	1	1	1	1	1	0	1	0	0	1	1	1	1	1	1	1	1	1	1	0	3	3
2	2	3	4	2	1	2	1	1	1	2	2	5, 1	1	1	0	1	1	0	1	1	0	1	1	1	0	1	0	1	1	1	1	0	1	0	1	1	1	1	1	1	0	1	1	1	1	0	1	3	3
2	2	1	3	2	1	1	1	4	1	2	1		1	1	1	1	1	0	1	0	1	1	1	0	0	1	0	1	1	1	1	1	0	1	0	1	1	1	1	1	1	1	1	1	1	1	1	2	3
1	4	1	5	3	3	3	4	1	3	2	2	4	1	1	1	1	0	1	1	1	1	1	0	1	1	1	1	0	1	1	1	1	0	1	1	1	0	1	1	1	1	1	1	1	1	1	1	3	3
1	2	1	4	1	3	3	2	4	2	2	2	2, 5, 4	1	1	1	1	1	1	1	0	1	1	1	0	1	1	1	1	0	1	1	1	1	1	1	1	1	1	1	1	1	1	1	1	1	1	0	2	2
1	2	1	4	1	3	1	5	1	3	2	2	4	1	1	1	0	1	1	1	1	1	1	1	0	1	1	1	1	1	1	1	1	0	1	0	0	1	1	1	1	1	1	1	1	1	1	0	2	3
1	2	2	5	1	3	3	3	4	1	2	2	4	1	1	0	0	0	0	0	1	0	0	0	1	0	0	0	0	1	0	0	0	1	0	1	1	0	0	0	0	0	0	0	0	0	0	1	2	1
1	1	1	5	1	3	1	1	2	2	2	2	6	1	1	0	0	0	0	0	1	0	0	0	1	0	0	0	0	1	0	0	1	0	1	1	1	0	1	1	1	1	0	1	1	1	0	1	3	3
1	3	4	3	3	2	3	2	4	1	2	2	1	1	1	0	0	1	0	1	0	1	1	0	0	0	0	0	0	0	0	1	0	0	1	0	1	1	1	1	1	0	0	0	1	1	0	0	3	3
1	2	2	4	1	3	3	2	4	1	2	1		1	1	0	1	1	1	1	0	1	1	1	1	0	0	0	1	0	1	1	1	0	1	1	1	0	1	1	1	0	1	0	1	1	0	0	2	3
1	3	1	3	1	2	3	3	2	3	2	2	1, 4	1	1	0	0	0	0	0	1	0	0	0	1	0	0	0	0	1	0	0	0	1	0	1	1	0	0	0	0	0	0	0	0	0	0	1	3	3
2	2	1	4	2	2	3	3	4	3	2	2	4	1	1	0	1	1	1	1	1	1	1	1	0	1	1	1	1	1	1	1	1	1	1	0	1	1	1	1	1	1	1	1	1	1	1	0	3	3
2	2	1	5	2	2	3	3	1	3	2	1		1	1	0	0	0	0	0	1	0	1	0	1	0	0	0	0	1	0	0	0	1	0	1	1	0	0	0	0	0	0	0	0	0	0	1	3	3
1	4	1	4	4	3	3	4	4	3	2	1		1	1	1	1	1	1	0	1	0	1	1	0	1	1	0	1	1	1	1	1	1	0	1	1	1	1	0	1	0	1	1	1	0	0	1	2	3
1	2	1	4	1	3	3	3	3	3	2	2	4	2	1	0	1	1	1	1	1	1	1	1	1	1	1	0	1	1	1	1	1	1	1	1	1	1	1	1	1	1	1	1	1	1	1	1	3	3
1	2	1	4	2	1	1	1	1	1	2	1		1	1	0	0	0	0	0	1	0	0	0	1	0	0	0	0	1	0	0	0	1	0	1	1	0	0	0	0	0	0	0	0	0	0	1	3	3
1	2	1	4	1	3	2	2	1	3	2	2	6	1	1	1	1	1	1	1	1	1	1	1	1	0	1	0	1	1	1	1	1	0	1	0	0	1	1	1	1	1	1	1	1	1	1	0	1	3
1	2	1	5	3	3	3	4	2	3	2	2	3	1	1	0	0	1	1	1	1	1	1	1	1	1	1	1	1	1	1	0	1	1	0	1	1	0	1	1	1	1	1	1	1	1	1	1	3	3
1	4	1	4	3	3	3	5	4	3	2	2	1	2	2	0	0	1	1	1	1	1	1	0	1	1	1	1	1	1	0	0	1	0	1	1	1	1	1	1	1	1	1	1	1	1	1	1	2	3
1	3	1	3	2	1	3	4	4	3	2	2	2, 1	1	1	0	0	0	0	0	1	0	0	0	0	0	1	0	0	1	0	0	0	0	1	0	0	1	0	0	0	0	0	0	0	0	0	1	3	1
1	3	2	2	2	2	3	3	4	3	2	1		1	1	0	0	1	1	1	1	1	1	0	1	0	0	0	0	1	0	1	1	1	1	1	1	0	1	1	1	1	1	1	1	1	1	1	3	3
1	2	1	5	1	3	3	3	2	3	2	2	6	1	1	0	1	1	1	1	1	0	1	1	1	0	0	0	1	1	1	1	1	1	0	1	1	1	1	1	1	1	1	1	1	1	1	0	2	3
1	2	2	1	1	1	3	5	4	3	2	2	2, 5, 4, 3	2	2	0	0	0	0	0	1	0	0	0	1	0	0	0	0	1	0	0	0	1	0	1	1	0	0	0	0	0	0	0	0	0	0	1	3	1
1	1	2	3	1	2	1	1	3	1	2	2	4, 2, 6, 5, 1, 3	2	2	0	0	0	1	1	1	1	0	0	1	0	0	0	1	1	0	0	1	0	0	0	1	1	1	1	1	1	1	1	1	1	0	1	3	3
1	2	1	5	1	3	3	2	2	3	2	2	1	1	1	0	0	0	1	1	1	1	1	0	1	1	0	0	1	1	0	1	1	1	1	1	1	1	1	1	1	1	1	1	1	1	1	0	2	3
1	2	1	4	1	3	3	2	1	3	2	2	3, 4	1	1	0	0	0	0	0	1	0	0	0	1	0	0	0	0	1	0	0	0	0	1	0	0	0	1	1	1	0	0	0	0	0	0	1	2	3
1	2	1	4	1	1	3	3	1	3	2	2	4, 1, 6, 2	2	1	0	1	1	0	0	0	1	0	1	0	0	0	0	1	0	1	1	1	0	1	0	0	1	1	1	1	1	1	1	1	1	1	0	2	3
1	2	2	4	1	3	1	2	2	1	2	1		2	1	0	0	1	1	1	1	1	1	1	1	0	1	0	1	0	1	1	1	0	1	0	1	1	1	1	1	1	1	1	1	1	0	0	3	3
1	2	3	4	1	3	3	2	1	3	2	1		2	1	0	0	1	1	1	1	1	1	1	1	0	1	1	1	1	1	1	1	0	1	0	0	1	1	1	1	1	1	1	1	1	1	1	2	3
1	3	1	3	1	3	3	5	4	3	2	1		1	1	1	1	0	1	1	1	1	0	1	1	0	0	0	0	1	0	0	1	1	0	1	1	1	1	1	1	1	1	1	1	1	1	1	3	3
1	2	1	4	1	2	3	4	4	3	2	2	4, 2, 3	1	1	1	1	1	1	1	1	1	1	1	1	0	0	0	1	1	1	1	1	1	1	1	0	1	1	1	1	1	0	1	1	1	0	1	3	3
1	2	1	3	1	2	3	3	4	1	2	2	1, 4, 2	1	1	0	0	1	1	1	1	0	1	1	1	0	0	1	1	0	0	1	1	1	0	1	1	1	1	1	1	1	1	1	1	1	0	1	2	3
1	4	1	3	4	3	3	5	4	3	2	1		1	1	0	0	0	0	1	1	1	1	0	1	0	0	0	1	1	0	1	1	0	0	1	1	1	1	0	1	0	0	0	1	1	0	1	2	3
1	3	1	4	1	3	3	5	4	3	2	2	6, 2	1	1	0	1	1	1	1	0	1	1	1	1	0	1	1	1	1	1	1	1	1	0	1	1	0	0	0	1	0	0	0	0	1	1	1	3	3
1	2	2	4	1	2	3	2	4	3	2	1		1	1	0	1	1	1	1	0	1	1	1	1	0	1	0	0	1	1	1	1	1	1	1	0	1	1	1	1	1	1	1	1	1	1	0	3	3
1	3	1	4	1	2	3	2	4	3	2	2	6, 4, 2	2	2	0	0	0	0	0	1	0	0	0	1	0	0	0	0	1	0	0	1	1	0	1	0	1	1	0	1	0	1	1	1	1	1	1	2	3
1	3	1	5	2	3	3	3	3	3	2	2	1	1	1	0	1	1	1	1	1	1	1	1	0	1	1	1	1	1	0	1	1	0	1	0	0	1	1	1	1	1	1	1	1	1	0	0	2	3
1	2	1	5	1	3	3	1	4	2	2	2	3	2	1	0	0	0	0	1	1	1	1	1	1	1	1	1	1	1	1	1	1	1	0	1	1	1	1	1	1	1	1	1	1	1	1	1	3	3
1	3	1	4	1	3	3	5	3	3	2	2	3	2	1	0	0	0	0	1	1	0	0	1	0	1	0	0	1	1	0	0	1	1	0	0	0	1	1	1	1	1	1	1	1	1	1	1	3	3
1	3	1	4	1	3	3	2	4	3	2	2	2, 4	1	1	0	1	1	1	0	1	0	1	1	1	0	1	0	1	1	1	1	1	1	1	1	1	1	1	1	1	1	1	1	1	1	1	0	3	3
1	4	1	5	1	3	3	5	4	3	2	2	3, 5, 1	2	2	0	0	1	0	0	1	0	0	0	1	0	1	0	0	0	0	0	1	0	1	1	1	1	1	1	1	1	1	0	1	1	1	1	2	3
1	2	1	5	1	3	3	3	4	3	2	2	6, 2	2	2	1	0	0	0	0	1	0	0	0	1	0	0	0	0	1	0	0	1	1	0	1	1	1	1	1	1	0	1	1	1	1	0	0	3	3
1	4	1	5	1	3	3	5	4	3	2	2	1	2	2	1	0	0	1	1	1	1	0	0	0	0	0	0	1	1	0	0	1	1	0	0	0	0	1	1	1	1	1	1	1	1	0	0	3	3
1	4	1	4	1	3	3	5	4	3	2	1		2	2	0	0	0	0	1	1	1	1	0	1	1	1	0	1	1	0	0	1	1	1	0	1	1	1	1	1	1	1	1	1	1	0	0	2	3
1	2	1	4	1	3	3	2	4	2	2	2	1, 2	2	1	0	0	0	0	0	1	0	0	0	1	0	0	0	0	1	0	0	0	1	0	1	1	0	0	0	0	0	0	0	0	0	0	1	3	3
1	1	1	4	3	1	1	1	2	2	2	2	2, 4	2	1	0	1	0	1	1	1	1	0	1	1	0	0	0	1	0	1	1	1	1	0	0	0	1	1	1	1	1	1	1	1	1	1	1	3	3
2	2	3	3	2	1	3	2	3	2	2	2	1, 3, 5	1	1	0	1	1	0	1	1	1	1	1	1	0	1	0	1	1	0	0	1	1	0	1	1	1	1	1	1	0	1	1	1	1	1	0	3	3
1	2	3	4	2	3	2	1	3	2	2	2	6	1	1	0	1	1	1	1	1	1	1	1	1	0	0	0	0	1	1	0	1	0	0	1	1	1	1	1	1	1	0	1	0	1	1	1	3	3
1	1	2	3	1	2	2	1	4	2	2	1		1	1	0	1	1	1	1	1	1	1	1	1	1	0	0	0	1	1	1	1	0	1	1	1	0	1	1	1	0	0	1	1	1	1	0	2	3
2	2	1	4	2	2	3	2	4	3	2	1		2	1	0	1	1	0	1	0	0	0	0	1	0	0	0	0	1	0	0	1	1	0	1	1	1	1	1	1	1	1	1	1	1	0	1	3	3
1	3	1	5	1	3	3	3	4	3	2	2	6, 2, 1	2	1	0	0	0	0	0	1	1	0	0	0	1	0	0	1	1	0	0	0	1	1	1	1	0	1	1	1	1	1	1	0	1	1	1	3	3
1	4	1	5	2	2	3	4	4	3	2	1		2	1	0	1	1	1	1	1	1	1	0	1	1	1	1	1	1	1	1	1	1	1	1	1	1	1	1	1	1	1	1	1	1	1	1	3	3
1	2	1	4	1	3	3	2	1	2	2	2	4	1	2	0	0	1	0	1	1	1	1	1	1	1	1	0	1	1	0	1	1	1	1	0	0	1	1	1	1	1	0	1	1	1	1	0	3	3
1	3	1	3	1	3	3	3	4	3	2	2	1	2	1	1	1	1	1	1	0	1	1	1	1	1	1	0	1	1	1	0	1	0	0	0	1	1	1	1	1	1	1	1	1	1	1	1	3	2
1	2	1	4	1	3	3	5	4	3	2	1		1	1	0	1	1	1	1	1	1	1	1	1	1	1	0	1	1	1	1	1	0	1	0	0	1	1	1	1	1	1	1	1	1	1	0	3	3
1	3	4	4	1	3	3	4	4	1	2	2	3, 5	2	1	0	0	1	1	1	1	1	1	1	0	1	1	0	1	0	1	1	1	1	1	1	1	1	1	1	1	1	1	1	1	1	1	1	3	3
1	1	1	4	1	2	2	3	1	3	2	1		2	2	0	0	0	1	0	0	1	0	0	0	0	0	0	1	1	0	0	1	1	1	1	0	1	1	1	1	1	1	1	1	1	1	0	3	3
2	2	1	4	3	1	2	2	4	3	2	2	2, 4	2	2	1	0	0	0	1	1	0	0	0	1	0	0	0	0	1	0	0	1	1	0	1	1	1	1	0	1	0	0	1	0	0	0	1	3	3
2	1	1	3	2	1	3	4	2	2	2	2	2, 4, 1	1	1	0	1	0	1	0	1	0	0	1	1	0	0	0	0	1	1	0	1	1	0	1	1	0	0	0	0	0	0	0	0	0	0	1	1	3
1	2	1	3	2	2	3	2	4	2	2	2	2, 3	1	1	0	1	0	0	0	1	0	0	0	1	0	0	0	0	1	0	0	0	1	0	1	1	0	0	0	0	0	0	0	0	0	0	1	3	3
1	3	1	4	1	3	3	5	4	3	2	2	4, 5	1	1	0	0	1	0	1	1	0	1	1	1	1	1	0	1	1	1	1	1	0	1	1	0	1	1	1	1	1	1	0	1	1	1	1	3	3
2	2	1	4	2	2	3	3	4	3	2	1		2	1	0	0	1	1	1	1	1	1	1	0	0	1	1	1	0	1	1	1	1	1	0	0	1	1	1	1	1	1	1	1	1	1	0	3	3
1	1	1	4	2	1	1	1	2	2	2	2	4	1	1	0	1	1	1	1	0	1	1	1	1	0	1	1	1	1	1	1	1	1	0	1	1	1	1	1	1	1	1	1	1	1	1	1	2	3
2	3	1	4	2	1	3	5	1	3	2	2	2, 3, 4	1	1	0	1	1	0	0	1	0	0	0	1	0	0	0	0	0	0	0	0	1	0	1	1	0	0	0	1	0	0	0	0	0	0	1	3	3
2	1	1	3	2	1	3	2	4	2	2	2	6	1	1	0	0	0	0	0	1	0	0	0	1	0	0	0	0	1	0	0	0	1	0	1	1	0	0	0	0	0	0	0	0	0	0	1	3	1
1	2	1	4	2	3	3	3	4	3	2	1		1	1	0	0	1	0	1	1	1	1	1	1	1	0	0	1	1	1	1	1	1	0	0	1	1	1	1	1	0	1	1	1	1	0	1	3	3
1	3	1	4	1	3	3	3	4	3	2	2	1, 3, 5	2	2	1	0	0	0	0	1	0	0	0	1	0	0	0	0	1	0	0	1	1	0	1	1	0	1	0	1	0	0	1	0	1	0	1	3	3
2	1	1	4	2	2	2	2	3	3	2	1		1	1	0	0	0	0	0	1	1	0	0	1	0	0	0	0	1	0	0	1	1	0	1	1	0	1	0	1	0	0	1	0	0	0	1	3	3
2	3	1	4	2	2	3	2	4	1	2	2	4	1	1	0	1	1	0	1	1	1	1	1	0	1	0	0	1	0	1	1	1	0	1	1	1	1	1	1	1	1	1	1	1	1	0	0	3	3
1	3	1	3	2	2	3	5	4	3	2	1		1	1	0	0	1	1	1	1	1	0	1	1	0	1	1	1	0	1	1	1	0	1	1	1	1	1	1	1	1	1	1	1	0	0	1	3	3
1	3	1	4	1	3	3	5	3	3	2	2	4, 6	2	1	1	0	1	1	1	1	1	1	1	1	1	1	0	0	1	1	1	0	1	0	1	1	0	1	0	1	1	0	0	0	1	1	1	3	3
1	2	1	4	1	2	2	1	3	1	2	2	4	1	1	1	0	1	0	1	1	1	1	1	1	0	0	0	0	1	1	0	1	0	1	1	1	1	1	0	1	1	1	1	1	1	1	1	3	3
1	2	1	4	1	2	2	2	4	1	2	2	3, 2, 1	2	1	0	0	1	0	1	1	0	0	1	0	0	0	0	0	0	0	1	1	1	0	1	0	1	1	1	1	0	0	0	0	0	0	0	2	3
1	3	1	4	1	3	3	3	4	3	2	2	1, 3, 5	2	2	0	0	0	0	1	1	0	0	0	1	0	0	0	1	1	0	0	1	1	1	1	1	1	1	1	1	0	1	1	1	1	1	1	3	3
1	2	2	3	1	2	1	1	1	1	2	2	4	1	1	1	1	1	1	1	0	1	1	1	0	0	1	1	1	1	1	1	1	1	1	0	1	0	0	0	1	1	0	0	1	1	1	1	3	3
1	3	1	4	2	2	3	5	2	3	2	2	4, 1, 2	1	1	0	1	1	1	1	1	1	1	1	0	1	1	1	1	1	1	1	1	1	1	1	1	1	1	1	1	1	1	1	1	1	1	1	3	3
1	2	2	4	1	3	2	2	4	3	2	2	4	1	1	0	1	1	0	0	1	0	1	0	0	0	0	0	0	1	0	0	1	1	0	1	1	0	0	0	0	0	0	0	0	1	0	1	3	3
1	3	1	3	1	3	3	4	2	3	2	2	3	1	1	0	1	1	0	1	0	1	1	1	0	1	1	1	1	1	1	1	1	1	1	0	0	1	1	1	1	1	1	1	1	1	1	0	2	3
1	2	3	3	1	2	3	2	4	1	2	2	4, 3, 6, 5	2	2	1	0	0	1	1	1	1	1	1	0	0	0	0	1	1	0	0	1	0	1	1	1	1	1	1	1	1	1	1	1	1	1	0	2	3
1	2	1	4	2	3	3	3	3	3	2	2	4	2	2	0	1	1	0	0	0	1	1	1	0	0	1	1	1	1	1	1	0	0	0	1	0	1	1	1	1	1	1	1	1	1	1	0	2	3
1	1	1	4	2	2	2	1	3	1	2	2	1, 4, 3	1	1	0	0	1	0	1	1	1	1	1	1	0	1	0	1	1	0	0	1	0	1	1	1	1	1	1	1	0	1	0	1	1	1	1	1	3
1	2	1	4	1	3	2	1	4	2	2	2	4	1	1	1	0	1	1	1	1	1	1	0	1	1	0	0	0	1	1	1	1	1	1	1	0	1	1	1	1	1	1	1	1	1	0	0	3	3
1	3	2	4	1	2	3	5	2	3	2	2	1, 4, 3	1	1	0	1	0	1	1	1	1	1	1	1	1	0	0	0	1	1	1	1	1	0	1	1	1	1	1	1	1	1	1	1	1	1	1	3	3
1	1	5	4	1	2	1	1	2	1	2	2	4	1	1	0	0	1	0	1	0	1	1	1	0	1	1	1	1	0	1	1	1	0	1	0	0	1	1	1	1	1	1	1	1	1	1	0	3	3
1	2	1	4	3	3	3	2	4	2	2	2	1	2	2	1	0	1	0	1	1	1	1	0	1	1	1	0	1	1	0	0	1	0	1	0	0	1	1	1	1	1	1	1	1	1	1	1	3	3
1	2	3	4	1	2	3	3	4	3	2	2	1	1	1	0	0	0	0	0	1	0	0	0	1	0	0	0	0	1	0	0	0	1	0	1	1	0	0	0	0	0	0	0	0	0	0	1	1	3
1	3	1	4	1	3	3	5	4	3	2	2	4, 1, 2	2	1	0	1	0	1	1	1	1	0	1	1	0	1	0	1	1	0	0	1	0	1	0	1	0	1	1	1	0	1	1	1	1	0	1	3	3
1	1	1	4	2	1	1	1	2	2	2	2	2	1	1	0	1	1	1	1	1	1	1	1	1	1	0	0	1	1	1	1	1	1	1	1	0	0	0	1	1	1	1	1	1	1	1	0	1	3
1	2	2	4	1	3	3	2	3	3	2	2	3	2	1	0	1	1	0	0	1	1	1	0	1	0	1	0	1	1	1	0	1	0	1	1	1	1	1	1	1	0	1	1	1	1	1	1	2	3
1	4	1	3	2	2	3	5	4	3	2	2	2, 6, 1	1	1	0	1	1	0	0	0	0	1	1	1	0	1	0	1	1	1	1	1	0	1	0	0	1	1	1	1	0	1	1	1	1	1	0	1	3
1	4	1	3	3	3	3	5	4	3	2	2	1, 2, 4, 3	2	1	0	1	1	1	1	0	1	1	1	1	1	1	0	1	0	1	1	1	0	1	1	0	1	1	1	1	1	1	1	1	1	1	1	3	3
1	3	1	3	1	3	3	2	4	3	2	2	1, 5, 4, 3	1	1	0	1	1	0	0	1	0	1	1	1	0	1	0	0	1	1	1	0	1	0	0	1	1	1	1	1	1	1	1	1	1	1	0	3	3
1	2	4	4	2	3	3	3	3	3	2	2	3	1	1	0	0	1	1	1	1	1	1	1	1	1	1	1	1	1	1	1	1	0	1	1	1	0	1	1	1	1	1	1	1	1	1	1	3	3
1	3	3	4	1	3	3	5	3	3	2	1		1	1	0	1	1	1	1	1	1	0	0	0	0	1	0	1	1	0	1	0	0	1	1	0	1	1	0	1	1	1	1	0	0	0	0	1	3
1	3	1	5	1	2	3	5	3	3	2	1		2	1	0	1	1	0	0	1	0	0	0	1	0	1	0	1	0	1	1	1	0	1	0	1	1	1	1	1	0	1	1	1	1	0	1	2	3
1	2	1	4	2	3	3	3	4	1	2	2	5, 4, 1	2	2	0	0	1	1	1	1	1	1	0	1	0	1	0	1	1	1	1	1	1	1	1	1	1	1	1	1	1	1	1	1	1	1	1	3	3
1	3	1	3	1	3	3	4	4	3	2	1		1	1	0	1	1	0	1	1	1	0	1	0	1	1	1	1	1	1	1	1	1	1	1	1	0	1	0	1	1	1	1	1	1	1	1	3	3
1	3	1	4	1	3	3	5	4	3	2	2	1, 4, 3	1	2	1	1	1	1	1	0	1	1	1	0	1	1	1	1	0	1	1	1	0	1	0	0	1	1	1	1	1	1	1	1	1	1	0	1	3
1	3	1	5	1	3	3	2	4	3	2	2	3, 1, 4	1	1	0	0	1	1	1	1	1	1	1	1	1	1	0	1	1	0	1	1	1	1	1	1	0	1	1	1	1	0	1	1	1	0	1	3	3
1	2	1	5	1	3	3	2	3	2	2	2	3, 4, 2	1	1	0	0	0	0	1	1	1	1	1	1	0	1	0	0	1	0	1	1	1	0	1	1	0	0	1	1	1	1	1	1	1	1	1	3	3
1	3	1	4	1	2	3	5	1	3	2	2	4, 3	1	1	0	0	1	1	0	1	1	1	1	0	1	1	1	1	1	1	1	1	0	1	1	1	1	1	1	1	1	1	1	1	1	1	1	2	3
1	2	1	5	1	3	3	2	4	1	2	2	2	1	1	0	0	0	0	0	1	0	1	1	1	0	1	1	1	1	1	1	1	1	1	1	1	1	1	1	1	1	1	0	1	1	1	1	1	3
1	1	5	4	1	2	1	2	3	2	2	2	5, 3, 2, 1, 4	2	1	0	1	1	0	0	1	0	0	0	0	0	0	0	0	0	0	0	0	0	0	0	0	1	0	0	0	0	0	0	0	0	0	1	3	3
1	2	4	4	1	3	2	2	2	3	2	2	2, 3, 5, 1, 4	1	2	0	0	1	1	1	1	1	1	1	1	0	1	0	1	1	0	1	1	1	0	1	1	1	1	1	1	1	1	1	1	1	0	0	3	3
1	3	1	4	1	3	3	5	4	3	2	1		1	1	1	1	1	1	1	0	1	1	1	0	1	1	1	1	0	1	1	1	0	1	0	0	1	1	1	1	1	1	1	1	1	1	0	2	2
1	2	3	5	1	3	3	2	4	1	2	2	3	1	1	0	0	0	0	0	1	0	0	0	1	0	0	0	0	1	0	0	0	1	0	1	1	0	0	0	0	0	0	0	0	0	0	1	3	3
1	2	1	4	1	3	3	4	3	3	2	2	1, 2, 4	2	1	0	1	1	1	1	0	1	1	1	1	1	1	1	1	0	1	1	1	0	1	0	0	1	1	1	1	1	1	1	1	1	1	0	3	3
1	3	1	4	2	2	3	3	4	3	2	2	3, 4	1	1	0	0	1	1	1	0	1	1	0	1	1	1	0	1	1	0	1	1	1	1	1	1	0	1	1	1	1	0	1	0	1	0	1	3	3
1	3	1	4	1	3	3	5	1	3	2	1		1	1	0	1	0	0	0	1	0	0	0	1	0	0	0	0	1	1	1	1	0	0	1	1	0	0	0	0	0	0	0	0	0	0	1	3	3
1	2	1	4	1	3	3	3	4	3	2	2	5, 3	1	1	0	0	1	1	1	1	1	1	1	1	1	1	1	0	1	0	0	1	1	0	1	1	1	1	1	1	1	1	1	1	1	1	0	3	3
2	2	1	4	4	1	3	4	1	3	2	2	6	1	1	0	0	1	0	1	0	0	0	0	1	0	0	0	0	1	1	1	1	1	0	1	1	0	0	0	1	0	1	1	1	1	0	1	2	3
1	2	2	5	1	3	3	3	4	3	2	2	4	1	1	1	1	1	1	1	1	0	1	1	1	0	1	0	1	1	1	1	1	0	1	1	1	1	1	1	1	1	1	1	1	1	1	1	2	3
1	2	1	3	1	2	3	4	3	3	2	2	2	2	1	0	0	0	0	0	1	0	0	0	1	0	0	0	0	1	0	0	0	1	0	1	1	0	0	0	0	0	0	0	0	0	0	1	1	3
1	2	3	4	1	3	3	2	2	3	2	2	1, 6, 2, 4	2	1	0	0	1	0	1	1	1	1	1	1	1	1	1	1	0	1	1	1	0	1	0	0	1	1	1	1	1	1	1	1	1	1	0	1	3
1	2	1	4	1	3	2	1	4	2	2	1		2	1	0	1	1	1	1	1	1	1	1	1	1	1	0	1	0	1	1	1	0	1	0	0	1	1	1	1	1	1	1	1	1	1	0	3	3
1	3	1	4	1	3	3	5	1	3	2	1		1	1	0	0	0	0	0	1	0	0	1	1	0	0	0	1	1	0	0	0	1	0	1	1	0	0	1	1	0	1	0	0	1	0	1	2	3
2	2	1	4	2	2	3	3	4	3	2	1		1	1	0	1	0	1	1	1	1	1	1	1	0	1	1	1	1	1	1	1	1	1	0	1	1	1	0	1	1	0	1	1	1	0	1	1	3
2	1	1	1	2	1	3	2	2	3	2	1		1	1	0	0	0	0	0	1	0	0	0	1	0	0	0	0	1	0	0	0	1	0	0	0	0	0	0	0	0	0	0	0	1	0	1	1	3
2	3	1	4	2	1	3	3	4	3	2	2	1	1	1	0	0	1	0	1	1	0	1	1	1	0	0	0	0	1	0	0	0	1	0	1	1	1	1	1	1	1	1	0	0	0	0	1	2	3
2	2	1	4	3	2	3	3	2	3	2	2	1, 2	1	1	0	1	1	0	1	1	0	1	1	1	0	0	0	1	1	1	1	1	1	1	1	0	0	0	1	1	1	1	1	0	1	0	0	3	3
1	4	3	4	1	3	3	3	4	3	2	2	4	1	1	0	0	0	0	0	1	0	0	0	1	0	0	0	1	1	0	0	0	1	0	0	1	1	1	0	1	0	1	0	1	0	0	1	2	2
1	3	1	5	1	3	3	5	4	3	2	1		1	1	0	0	0	0	0	1	0	0	0	1	0	0	0	0	1	0	0	0	1	0	1	1	0	0	0	0	0	0	0	0	0	0	1	3	3
1	4	1	4	1	3	3	5	4	3	2	2	1	1	1	0	1	0	0	0	1	0	0	0	1	0	0	0	0	1	0	0	0	1	0	1	1	0	0	0	0	0	0	0	0	0	0	1	3	3
2	1	1	4	3	1	3	4	2	3	2	2	1, 4, 3	1	1	1	1	1	0	0	0	0	1	1	1	0	1	0	1	1	1	1	1	0	1	1	1	1	1	1	1	1	1	1	1	1	1	0	2	2
1	2	1	4	2	3	3	3	2	1	2	2	1, 3, 4	1	1	0	1	1	0	0	1	1	1	0	1	0	1	0	1	1	0	1	1	1	0	1	1	0	1	1	1	1	1	1	1	0	0	1	1	3
2	1	1	3	2	1	1	1	1	1	2	2	4	1	1	1	0	1	0	0	1	0	0	0	1	0	0	0	1	1	0	0	1	1	0	0	1	0	0	0	0	0	0	0	0	0	0	1	3	3
2	2	1	5	2	3	2	2	1	3	2	1		2	1	0	0	0	0	1	1	1	0	0	1	0	0	0	1	1	0	1	0	1	0	1	1	0	1	1	1	1	1	1	1	1	1	1	1	3
1	2	1	4	1	3	3	2	4	2	2	2	4	1	1	1	0	1	1	1	1	0	0	0	1	0	0	0	0	1	0	0	1	0	1	1	1	0	0	0	0	0	0	0	0	0	0	1	3	3
1	3	1	4	1	3	3	1	1	1	2	2	4	1	1	0	1	1	1	1	1	1	1	1	1	0	0	0	1	1	1	1	1	0	1	1	1	1	1	1	1	1	0	1	1	1	1	0	3	3
1	3	1	4	1	3	1	2	2	2	2	2	3	2	2	0	0	0	0	1	1	1	1	0	1	1	0	0	1	1	0	1	1	1	0	1	1	0	0	1	1	1	1	1	1	1	1	1	3	3
1	3	1	4	1	3	3	5	2	3	2	2	4	1	1	0	0	0	0	1	1	0	0	1	1	0	0	0	1	1	1	0	1	1	0	1	1	1	1	1	1	1	1	1	1	1	1	1	3	3
1	3	1	4	1	3	3	3	4	3	2	2	1, 2, 3	1	1	0	0	1	1	1	1	0	0	0	1	0	1	1	1	1	0	0	1	1	0	1	1	1	1	1	1	0	1	1	1	1	0	1	3	3
1	2	2	4	1	3	1	1	3	1	2	2	2, 1, 4	1	1	0	0	1	0	1	1	0	1	1	0	0	0	0	1	1	1	1	1	0	0	0	1	1	1	0	1	0	1	1	1	0	0	1	3	3
1	1	3	4	1	2	2	1	4	1	2	2	5, 1, 4, 2	1	1	0	0	0	0	0	1	0	0	0	1	0	0	0	0	1	0	0	0	1	0	1	1	0	0	0	0	0	0	0	0	0	0	1	3	3
1	2	4	4	2	2	2	3	2	3	2	2	3, 1, 2	2	2	0	0	0	0	0	1	1	0	0	1	0	1	0	1	1	0	0	1	0	1	1	1	1	1	1	1	1	1	1	0	1	1	1	2	3
1	2	1	4	1	3	3	2	4	2	2	1		1	1	0	1	1	1	1	0	1	1	1	1	0	0	0	1	0	1	1	0	0	0	0	1	1	1	1	1	1	1	0	1	1	1	1	3	3
1	3	1	4	1	3	3	5	2	3	2	2	6	1	1	0	0	0	0	0	1	0	0	1	1	0	0	0	0	1	0	0	1	1	0	1	1	1	1	1	1	1	1	1	1	1	1	1	3	3
1	2	4	5	2	3	3	2	1	3	2	2	1, 2, 4, 3	1	1	0	0	1	1	1	1	1	1	1	1	1	1	0	1	1	1	1	1	1	1	1	1	1	1	1	1	1	1	1	1	1	1	1	3	3
1	2	2	4	1	3	3	2	4	2	2	1		1	1	0	0	0	0	0	1	0	0	0	1	1	1	1	1	1	1	1	1	0	1	1	1	1	1	1	1	1	1	1	1	0	0	1	3	3
1	2	1	4	1	3	3	3	2	2	2	2	2, 1	1	1	0	1	1	1	1	1	1	1	1	1	1	1	0	1	1	1	0	1	1	1	1	1	0	0	1	1	1	1	1	1	1	1	0	3	3
1	3	1	4	1	3	3	5	4	3	2	2	3	2	1	0	1	1	1	1	1	1	1	1	1	1	1	1	1	0	1	1	1	1	1	0	0	1	1	1	1	1	1	1	1	1	1	0	3	3
1	2	3	4	1	2	2	2	3	2	2	2	4	2	1	0	1	1	1	1	0	1	0	1	0	0	0	0	1	0	1	1	1	0	1	0	0	1	1	1	1	1	1	1	1	1	1	0	3	3
1	2	1	3	2	2	3	2	2	1	2	1		2	1	0	1	1	0	1	1	1	0	1	0	0	0	0	1	1	1	1	1	0	1	0	0	1	1	1	1	0	1	0	1	1	1	1	3	3
1	3	1	4	1	3	3	5	4	3	2	2	3	1	1	0	0	0	1	0	1	1	0	0	1	0	0	0	1	1	0	0	1	1	0	1	1	1	1	1	1	1	1	1	1	1	0	1	3	3
1	2	1	4	1	3	3	2	4	2	2	2	6	1	1	1	0	1	0	0	1	1	1	0	1	1	1	0	1	1	0	1	1	0	1	1	0	1	1	1	1	1	1	1	1	1	1	0	2	3
1	3	1	4	1	3	2	2	4	3	2	2	4	2	1	0	1	1	1	1	0	1	1	1	0	1	1	1	1	0	1	1	1	1	1	1	1	1	1	1	1	1	1	1	1	1	1	0	3	3
1	2	1	4	1	2	3	3	4	3	2	1		1	1	0	0	0	0	0	1	1	0	0	1	0	0	0	1	0	0	0	1	1	0	1	1	1	1	0	1	0	1	0	1	0	0	1	3	3
1	2	2	4	1	3	3	2	4	3	2	2	3	2	1	0	1	1	0	1	0	0	1	1	0	0	1	0	1	1	1	1	1	0	1	0	0	1	1	1	1	1	1	1	1	1	1	0	3	3
1	2	1	4	2	2	1	2	1	1	2	1		1	1	0	0	0	0	1	1	1	0	0	1	0	0	0	0	1	0	0	1	0	1	0	0	1	1	1	1	1	1	1	1	1	0	1	3	3
1	3	2	4	1	3	3	1	4	1	2	2	3	1	2	1	1	1	1	1	0	1	1	1	0	1	1	1	1	0	1	1	1	0	1	0	0	1	1	1	1	1	1	1	1	1	1	0	3	3
1	2	1	5	1	3	3	3	4	3	2	2	4	2	2	0	0	1	1	1	1	1	1	1	1	0	0	0	1	0	0	0	1	0	1	0	1	1	1	1	0	0	0	1	1	1	0	0	3	3
1	2	1	4	1	2	3	1	2	1	2	2	3	1	1	0	0	0	0	0	1	0	0	0	1	0	0	0	0	1	0	0	1	0	1	0	0	1	1	1	1	1	1	1	1	1	1	0	3	3
1	3	1	5	1	3	3	1	4	1	2	1		2	1	0	1	1	1	1	1	1	1	1	1	0	0	1	1	1	0	0	1	1	0	1	1	1	1	1	1	1	0	1	1	1	1	1	2	2
1	2	1	4	1	2	3	1	4	2	2	2	3	1	1	0	0	0	0	0	1	1	0	0	1	0	0	0	0	1	0	0	1	0	1	1	1	1	1	1	1	1	1	1	1	1	1	0	3	3
1	4	1	4	1	3	3	5	4	3	2	2	4, 3, 2, 1	2	2	0	0	1	0	1	1	1	1	1	0	0	0	0	1	0	0	0	1	0	1	0	0	1	1	0	0	1	1	1	1	1	0	0	3	3
1	4	1	5	1	3	3	2	3	2	2	2	6	1	1	0	1	1	1	1	1	1	1	1	1	1	1	1	1	1	1	1	1	1	1	1	1	1	1	1	1	1	1	1	1	1	1	0	2	3
1	4	1	4	2	3	3	2	4	1	2	2	5, 1, 2	1	1	0	1	1	0	1	1	0	0	1	1	0	1	0	1	1	0	1	1	0	0	1	1	0	1	0	1	1	1	0	1	1	0	1	2	3
1	2	1	4	1	2	2	2	1	3	2	1		1	1	0	1	1	0	1	0	1	1	1	0	1	1	0	0	1	1	1	1	1	0	0	1	1	1	1	1	1	1	1	1	1	0	0	2	3
1	3	1	4	1	2	3	3	2	2	2	2	3	1	2	1	0	0	0	0	1	0	0	0	1	0	0	0	0	1	0	0	1	1	0	1	1	1	1	1	1	1	1	1	1	1	1	1	3	3
1	3	1	4	1	3	3	5	4	2	2	1		2	2	0	0	0	1	1	1	1	0	0	1	1	1	0	1	1	0	0	1	1	0	0	1	1	1	1	1	1	0	1	0	1	0	1	3	3
1	3	1	4	1	3	3	4	4	1	2	2	4	1	1	0	0	0	0	1	1	0	0	0	1	1	1	0	1	1	0	0	0	1	0	1	1	0	0	0	0	0	0	1	0	0	0	1	2	3
1	3	1	4	1	3	3	4	4	3	2	1		1	1	0	0	1	0	1	1	1	0	0	0	0	1	0	1	0	0	1	1	0	1	0	0	1	1	1	1	1	1	1	1	1	1	0	3	3
1	3	4	3	2	2	2	2	4	2	2	1		2	1	0	0	0	0	0	1	0	0	0	1	0	0	0	1	1	0	0	1	1	0	1	1	1	1	1	1	1	1	1	1	1	1	1	3	3
1	1	2	4	1	3	1	1	2	1	2	1		2	2	0	0	0	0	0	1	0	0	0	1	0	0	0	0	1	0	0	1	0	1	1	1	1	1	1	1	0	1	1	1	1	0	0	3	3
1	1	2	3	1	1	2	2	3	1	2	1		1	1	0	1	0	0	1	1	1	1	1	1	0	1	0	1	1	1	1	1	1	1	1	1	1	1	1	1	1	1	1	1	1	1	1	3	3
1	3	2	3	1	3	3	4	4	3	2	1		2	1	0	0	1	0	1	1	1	1	0	1	0	1	1	1	0	1	1	1	0	1	0	0	1	1	1	1	1	1	1	1	1	1	1	3	3
1	2	4	3	1	2	2	2	2	1	2	1		1	1	0	1	1	1	1	0	0	1	1	1	0	0	0	1	0	1	0	0	0	0	0	0	1	1	1	1	0	1	1	1	1	0	1	3	3
1	1	1	3	2	1	1	2	1	1	2	2	3	1	1	0	0	1	0	1	0	1	1	1	1	0	1	0	1	1	1	1	1	1	0	1	1	1	1	1	1	1	1	1	1	1	1	1	3	3
1	3	1	2	2	1	3	3	4	3	2	1		1	1	0	1	1	0	1	0	1	0	1	1	0	1	1	1	0	1	1	1	0	1	1	0	1	1	1	1	1	1	1	1	1	1	0	1	3
2	2	1	4	2	2	2	2	2	1	2	2	6	1	1	0	0	1	1	1	0	1	1	1	1	0	1	0	1	1	1	1	1	0	1	0	1	1	1	1	1	1	1	1	1	1	1	0	3	3
2	2	1	4	2	1	1	2	1	3	2	2	6	1	1	1	0	1	1	1	1	1	0	0	1	0	1	0	1	1	0	0	1	0	1	0	0	1	1	1	1	1	1	1	1	1	0	1	3	3
2	2	1	3	2	2	2	1	1	1	2	2	4	2	1	0	0	1	0	0	1	1	0	1	1	1	0	0	0	0	0	1	1	1	0	1	1	0	1	0	1	0	0	1	0	1	0	0	3	3
1	4	1	3	4	3	3	5	4	3	2	2	3, 5	1	1	0	0	1	0	1	0	1	0	1	1	0	1	0	0	1	1	0	0	1	0	1	1	0	0	0	0	0	0	0	0	0	0	1	3	3
1	2	1	3	1	2	3	3	3	3	2	2	1, 3, 2	2	1	0	0	0	0	1	1	1	0	0	1	0	0	0	0	1	0	0	1	0	1	1	1	1	1	1	1	1	1	0	1	1	0	1	3	3
1	4	1	3	2	2	3	4	4	3	2	1		2	2	0	1	0	0	0	1	0	0	0	0	0	0	0	0	1	0	0	1	0	0	1	1	0	0	0	0	0	0	0	1	0	0	1	3	2
1	1	2	5	3	1	1	1	1	1	2	1		1	1	1	0	0	1	1	1	1	0	0	1	0	1	0	0	0	0	1	1	0	1	0	1	1	1	1	1	1	0	1	1	1	0	1	3	3
2	2	1	4	2	3	3	4	4	3	2	1		2	1	1	1	1	1	1	1	0	1	1	0	0	1	1	1	0	1	1	1	0	1	0	0	1	1	1	1	1	1	1	1	1	1	0	3	3
1	2	1	4	2	2	3	5	4	3	2	1		1	1	0	0	0	0	0	1	0	0	0	1	0	0	0	0	1	0	0	0	1	0	1	1	0	0	0	0	0	0	0	0	0	0	1	3	3
1	3	1	4	1	3	3	1	4	2	2	1		1	1	1	1	1	1	1	0	1	1	1	0	1	1	1	1	0	1	1	1	0	1	0	0	1	1	1	1	1	1	1	1	1	1	0	3	3
1	3	1	5	1	3	3	2	4	1	2	1		2	2	0	0	1	1	1	1	1	1	1	1	1	1	0	1	0	1	1	1	1	1	1	1	1	1	1	1	1	1	1	0	1	1	1	2	3
2	3	1	2	2	2	3	2	4	3	2	2	3	1	1	0	0	0	0	0	1	0	0	0	1	0	0	0	0	1	0	0	0	1	0	1	1	0	0	0	0	0	0	0	0	0	0	1	1	3
2	1	1	2	2	1	1	1	1	1	2	2	3	1	1	0	0	0	0	0	1	0	0	0	1	0	0	0	0	1	0	0	0	1	0	1	1	0	0	0	0	0	0	0	0	0	0	1	3	3
1	3	4	5	2	3	3	3	3	3	2	2	3	2	1	0	0	1	0	0	1	0	1	0	1	0	0	0	0	1	0	0	1	1	0	1	1	1	1	1	1	1	1	1	1	1	0	1	3	3
1	1	2	4	1	3	2	2	1	3	2	1		1	2	0	0	1	1	1	1	1	0	0	1	1	0	0	1	1	0	0	1	1	0	1	1	1	1	1	1	1	1	1	1	1	1	1	3	3
1	2	4	3	2	2	3	4	1	3	2	1		2	2	0	1	1	1	1	1	1	1	0	0	0	1	1	1	1	1	1	1	0	1	0	1	1	1	1	1	1	1	1	1	1	1	0	3	3
1	3	1	3	4	1	3	5	2	3	2	2	4, 1	2	1	0	1	0	0	0	1	0	0	0	0	1	1	0	1	0	0	1	0	1	0	1	1	0	0	0	1	0	1	1	1	1	1	0	3	3
1	2	2	4	1	3	3	4	4	3	2	1		2	1	0	1	1	0	0	1	0	1	1	1	0	1	0	1	1	0	0	0	1	0	0	1	1	0	0	1	0	1	1	0	0	0	1	3	3
1	3	1	4	1	3	3	4	4	3	2	1		2	1	0	0	0	0	1	1	1	1	1	1	0	0	0	1	1	1	0	1	1	0	0	1	0	1	1	1	1	0	1	1	1	0	1	2	3
1	4	4	4	1	3	3	5	4	3	2	1		1	1	0	1	1	1	1	0	1	0	1	1	0	0	0	0	1	0	0	1	0	1	1	1	1	1	1	1	1	1	1	1	1	1	1	2	3
1	3	1	4	1	3	3	5	4	3	2	1		2	2	0	1	1	0	0	1	0	1	0	1	0	1	0	1	1	0	0	1	0	1	0	1	1	1	1	1	1	1	1	1	1	1	1	3	3
1	2	1	4	1	3	3	3	3	3	2	1		1	1	0	1	1	1	1	0	1	0	1	0	1	0	0	1	1	1	1	1	1	0	1	1	0	1	1	0	1	1	0	0	0	0	1	3	3
1	2	3	5	2	3	2	1	3	1	2	2	4, 6	1	1	0	0	0	0	0	1	0	0	0	1	0	0	0	0	1	0	0	0	1	0	1	1	0	0	0	0	0	0	0	0	0	0	1	3	3
1	3	1	4	2	3	3	4	1	3	2	2	3, 4, 2	2	1	1	0	1	0	1	1	1	1	0	0	0	1	1	1	0	1	1	1	0	1	0	1	1	1	1	1	1	1	1	1	1	1	1	3	3
1	2	3	4	1	2	2	2	4	3	2	2	4	1	1	0	1	1	0	0	1	0	0	0	1	0	1	0	0	1	1	1	0	1	0	1	1	1	0	0	1	1	1	1	1	1	1	1	2	3
1	2	3	5	1	3	3	3	4	3	2	2	2, 1, 4, 5	1	1	0	1	1	1	1	1	1	0	1	1	1	1	0	1	1	1	1	1	1	1	1	1	1	1	1	1	1	1	1	1	1	1	0	2	3
1	3	1	2	3	3	3	3	4	3	2	1		1	1	0	0	0	0	0	1	0	0	0	1	0	0	0	0	1	0	0	0	1	0	1	1	0	0	0	0	0	0	0	0	0	0	1	3	3
1	3	2	4	2	1	3	2	4	1	2	1		1	1	0	1	1	0	1	1	1	1	1	1	1	1	0	1	1	1	1	1	1	0	1	1	1	1	0	1	1	0	1	0	1	1	1	3	3
1	3	1	5	1	3	3	1	4	1	2	1		1	1	0	0	0	0	0	1	0	1	1	1	0	1	0	0	1	0	0	0	1	0	1	1	0	0	0	0	0	0	0	0	0	0	1	2	3
1	2	1	4	1	3	3	2	1	1	2	1		1	1	0	0	0	0	0	1	0	0	0	1	0	0	0	0	1	0	0	0	1	0	1	1	0	0	0	0	0	0	0	0	0	0	1	3	3
1	3	1	5	1	3	3	5	3	3	2	1		2	1	0	1	1	1	1	1	1	1	1	1	0	1	0	1	1	1	1	1	1	1	1	1	1	1	1	1	1	1	1	1	1	1	1	3	3
1	4	1	5	1	3	3	5	4	3	2	1		2	1	0	1	1	1	1	1	1	1	1	1	1	1	0	1	1	1	1	1	0	1	1	1	1	1	1	1	1	1	1	1	1	1	0	3	3
1	2	1	5	1	3	3	3	3	3	2	2	4, 2, 1	1	1	0	1	1	0	1	1	1	1	1	1	0	0	0	0	1	1	1	1	0	1	1	1	1	0	1	0	1	1	1	1	1	1	0	3	3
1	2	1	5	1	3	2	5	4	3	2	1		2	1	0	1	1	0	1	1	1	1	1	1	0	0	1	0	1	0	1	1	0	1	1	0	1	1	1	1	1	1	1	1	1	1	1	3	3
1	2	1	4	2	3	2	2	3	1	2	1		2	1	1	1	1	1	1	0	1	1	1	1	0	1	1	1	1	1	1	1	0	1	1	1	1	1	1	1	1	1	1	1	1	1	0	3	3
1	3	2	5	1	3	3	4	4	3	2	1		2	1	1	1	1	1	1	1	1	1	1	0	1	1	1	1	1	1	1	1	1	1	0	0	1	1	1	1	1	1	1	1	1	1	1	3	3
1	1	1	4	2	2	1	1	1	2	2	1		1	1	0	0	1	0	0	0	1	0	1	1	0	0	0	0	1	0	1	0	1	0	0	1	1	0	0	0	0	0	0	0	0	0	1	3	3
1	2	1	5	2	3	3	3	4	3	2	1		1	1	0	1	1	1	1	1	1	1	1	0	1	1	0	1	0	1	1	1	0	1	1	1	1	1	1	1	1	1	1	1	1	0	1	3	3
1	2	1	4	1	3	3	4	4	3	2	1		1	1	0	1	1	1	1	1	0	1	1	1	0	1	0	1	1	1	1	1	1	0	1	1	1	1	1	1	0	1	1	1	1	1	1	3	3
1	3	1	4	1	3	3	5	4	3	2	2	6	1	1	0	1	1	1	0	0	0	1	0	1	1	0	0	0	1	0	0	0	1	0	1	1	0	1	1	1	0	1	1	1	1	1	0	2	3
2	2	3	3	4	1	2	2	1	1	2	1		2	1	0	0	1	0	0	0	1	0	1	1	0	1	0	0	1	0	1	0	0	1	1	1	0	0	1	0	1	0	0	0	0	0	1	3	3
1	2	1	5	1	3	3	2	4	3	2	2	1, 6, 2, 3	1	1	0	1	1	1	1	1	1	1	1	1	1	1	0	1	1	1	1	1	1	0	1	1	1	1	1	1	1	1	1	1	1	1	1	3	3
1	2	1	5	1	3	3	3	4	1	2	2	4, 2	2	2	0	0	0	0	1	0	1	0	0	1	0	0	0	1	0	0	1	1	0	1	0	0	1	1	1	1	1	1	1	1	1	1	0	3	3
1	2	1	5	1	3	3	2	4	2	2	2	1, 4	2	1	0	0	0	0	0	1	1	0	0	1	0	0	0	0	1	0	0	1	1	0	1	1	1	1	1	1	1	1	1	1	1	1	1	3	3
1	2	2	5	1	3	3	4	4	3	2	2	1, 4	2	1	0	1	1	1	1	0	1	1	1	0	1	1	1	1	0	1	1	1	1	0	1	1	1	1	1	1	1	1	1	1	1	1	0	3	3
2	2	1	4	2	1	3	5	4	3	2	1		1	1	0	0	0	0	0	1	0	0	0	0	0	0	0	1	1	0	0	0	0	1	1	1	1	1	0	1	0	0	0	0	0	0	1	3	3
1	1	1	4	2	2	1	1	2	1	2	2	4, 1	1	1	1	1	1	1	1	0	1	1	1	1	0	1	1	0	1	1	1	1	0	1	1	1	0	1	1	1	1	1	0	0	1	1	1	3	3
1	1	1	3	4	1	2	1	3	1	2	1		1	1	0	0	1	1	1	1	1	1	1	1	1	1	0	1	1	1	1	1	0	1	1	1	0	0	0	0	1	0	0	0	0	0	1	3	3
1	3	1	5	1	3	3	5	4	3	2	2	1, 2, 5, 3	2	1	0	1	1	0	0	1	0	1	1	1	0	1	0	1	1	0	0	1	1	1	1	1	1	1	0	0	1	1	1	1	1	1	1	3	3
1	2	1	3	2	2	3	4	2	3	2	2	1, 2	1	1	0	1	1	0	0	0	0	1	1	1	0	0	0	1	1	1	0	0	1	0	1	1	0	1	0	1	1	0	1	1	0	0	0	2	3
2	3	1	4	2	2	3	3	4	2	2	1		1	1	0	0	0	0	0	1	0	0	0	1	0	0	0	0	1	0	0	0	1	0	1	1	0	0	0	0	0	0	0	0	0	0	1	3	1
2	2	1	2	2	1	3	5	3	3	2	2	6	1	1	0	0	1	0	1	1	0	0	0	1	0	0	0	0	1	0	0	1	1	0	0	1	0	1	0	0	0	0	0	0	0	0	1	2	3
1	3	1	5	1	3	3	1	4	2	2	2	5, 2	2	1	1	0	0	1	1	1	1	1	0	1	1	1	1	1	1	0	1	1	1	1	1	1	1	1	1	1	1	1	1	1	1	1	1	2	3
1	2	1	4	1	3	3	2	4	1	2	2	1	1	1	0	0	0	0	0	1	0	0	0	1	0	0	0	0	1	0	0	1	1	0	1	1	1	1	1	1	0	1	1	1	1	0	1	3	3
1	2	1	4	1	2	2	1	3	2	2	2	6, 2	1	2	0	0	0	0	0	1	0	0	0	1	0	0	0	0	1	0	1	1	1	1	0	0	1	1	1	1	1	1	1	1	1	1	0	2	3
1	1	2	4	1	2	1	1	2	2	2	2	2, 1	1	1	0	0	0	0	0	1	0	0	0	0	0	0	0	0	1	0	0	0	1	0	0	0	0	0	1	0	0	0	1	0	0	0	1	3	3
1	2	1	4	1	2	3	2	3	3	2	2	5, 3, 4, 2	1	1	1	1	1	1	1	1	0	0	1	1	0	0	1	1	1	1	0	0	1	0	1	1	1	0	0	1	0	0	0	0	0	0	1	3	3
1	3	1	3	3	2	3	4	3	3	2	2	1	1	1	0	1	1	1	1	1	1	1	1	0	1	1	1	1	0	1	1	1	0	1	0	1	0	1	1	1	1	1	1	1	1	1	0	3	3
1	3	1	3	1	2	3	5	4	2	2	1		2	1	0	0	1	1	1	0	1	1	1	1	1	1	0	1	1	1	1	1	1	1	0	1	1	1	1	1	1	1	1	1	1	1	1	3	2
1	3	2	3	1	3	3	5	3	3	2	1		2	2	0	1	0	0	1	1	0	0	0	0	0	0	1	1	1	0	0	1	0	1	0	1	1	1	1	1	1	1	1	1	1	0	0	2	3
1	1	5	5	3	3	1	1	1	1	2	1		1	1	0	0	0	1	1	0	1	1	1	0	0	0	1	1	1	1	1	1	0	1	0	0	1	1	1	1	1	1	1	1	1	1	1	3	3
1	3	1	4	1	1	3	4	1	3	2	2	4	1	1	0	0	1	0	0	1	0	0	0	0	0	0	0	0	1	0	0	0	1	0	1	1	0	0	0	0	0	0	0	0	0	0	1	3	1
1	2	3	4	1	3	2	1	4	2	2	1		2	1	0	0	0	0	1	1	1	1	0	1	1	1	1	1	1	1	1	1	1	1	1	1	1	1	1	1	1	1	1	1	1	1	1	3	3
1	2	1	3	1	2	3	3	3	1	2	2	6	1	1	0	1	0	0	1	1	1	1	0	1	1	1	0	1	1	1	1	0	1	0	1	1	1	1	0	1	0	1	0	0	1	0	1	3	3
1	4	1	5	1	3	3	4	4	2	2	1		1	1	0	0	0	1	1	1	0	0	0	1	1	0	1	1	1	0	0	1	1	0	1	1	1	1	1	1	1	0	1	1	1	1	1	3	3
1	4	1	4	2	3	3	4	4	3	2	1		1	1	0	0	0	0	0	1	0	1	1	1	1	1	0	1	0	1	1	1	0	1	0	0	1	1	1	1	1	1	1	1	1	1	1	3	3
1	3	1	4	1	3	3	4	4	3	2	2	2	1	1	0	0	0	0	0	1	0	0	0	1	0	0	0	0	1	0	0	0	1	0	1	1	0	0	0	0	0	0	0	0	0	0	1	2	3
1	2	1	4	1	2	3	2	4	3	2	2	3	1	1	1	1	1	1	1	0	0	1	1	1	0	0	0	1	1	1	1	1	1	0	1	1	1	1	1	1	1	1	1	1	1	1	1	3	3
1	2	1	4	2	3	3	1	4	1	2	2	6	1	1	0	1	1	1	1	1	1	1	1	1	0	1	1	1	1	1	1	1	0	1	1	1	0	1	1	1	1	1	1	1	1	1	1	2	3
2	3	1	5	1	3	3	5	4	3	2	1		2	1	0	0	1	1	1	1	1	1	1	0	1	1	1	1	1	1	1	1	1	1	0	1	1	1	1	1	1	1	1	1	1	1	1	3	3
1	2	1	5	2	1	3	3	3	3	2	1		1	1	0	1	0	0	1	1	0	1	1	0	0	0	0	1	1	1	1	1	1	0	1	1	0	1	1	0	1	1	0	1	1	1	1	3	3
1	3	2	5	1	3	3	5	4	3	2	2	2	1	1	0	1	1	1	1	0	1	1	1	1	1	1	1	1	0	1	1	1	0	1	1	1	1	1	1	1	1	1	1	1	1	1	1	3	3
1	1	1	4	1	3	1	1	1	1	2	1		1	1	0	1	1	1	1	1	1	1	1	0	1	1	1	1	0	1	1	1	0	1	0	0	1	1	1	1	1	1	1	1	1	1	0	3	3
1	1	2	3	1	2	2	2	3	3	2	2	1	1	1	0	0	1	1	1	1	1	1	1	1	0	1	1	1	1	1	1	1	0	1	0	1	1	1	1	1	1	1	1	1	1	1	1	2	3
2	3	1	4	2	2	3	4	4	3	2	2	6	1	1	0	0	0	0	0	1	0	0	0	1	0	0	0	0	1	0	0	0	1	0	1	1	0	0	0	0	0	0	0	0	0	0	1	3	3
1	4	1	5	1	3	3	5	4	3	2	2	2	1	1	1	1	1	1	1	1	0	1	1	1	1	0	0	1	1	1	1	1	0	1	0	1	0	1	0	0	0	1	1	1	1	1	0	3	3
1	4	1	4	1	3	3	3	4	3	2	2	2	1	1	0	0	0	1	0	1	1	0	0	0	1	0	0	0	1	0	0	1	0	0	0	1	1	1	1	1	1	1	1	1	1	1	0	3	3
1	3	1	4	2	2	3	3	4	3	2	1		1	1	1	0	1	1	1	1	1	1	0	0	0	1	1	1	0	1	1	1	0	1	0	0	1	1	1	1	1	1	1	1	1	1	0	3	3
1	2	1	4	1	3	3	5	1	3	2	1		2	1	0	1	0	0	1	1	0	1	1	1	0	1	0	1	0	1	1	0	1	0	0	1	1	1	1	1	1	1	1	1	1	1	1	2	3
1	1	1	3	1	2	3	1	1	2	2	2	2	1	1	0	1	0	0	0	1	0	0	0	1	0	0	0	0	1	0	0	0	1	0	1	1	0	0	0	0	0	0	0	0	0	0	1	3	3
1	1	1	4	1	2	1	1	2	2	2	2	3	1	1	0	1	1	1	1	1	0	0	0	1	0	0	0	0	1	0	0	1	1	1	0	1	1	1	1	1	0	0	1	1	1	0	1	3	3
1	2	1	4	1	3	3	2	3	3	2	2	3	1	1	0	1	1	0	1	0	0	0	1	1	0	1	0	1	1	1	1	1	0	1	1	1	1	1	0	1	1	1	1	1	1	1	0	3	3
1	1	2	3	4	1	1	2	3	2	2	2	2	2	2	1	0	0	0	0	1	0	0	0	1	0	0	0	0	0	0	0	1	0	0	0	0	1	0	0	0	0	0	0	0	0	0	1	3	3
1	1	2	3	1	2	2	2	3	3	2	1		1	1	0	0	1	0	1	1	1	1	1	1	0	1	0	1	0	1	1	1	1	1	1	1	1	1	1	1	1	1	1	1	1	1	0	3	3
1	2	2	3	1	2	1	1	1	2	2	2	4	2	2	0	1	0	0	0	1	0	0	0	1	0	0	0	0	1	0	0	1	0	1	1	0	1	0	1	1	0	1	1	0	1	0	0	3	3
1	2	1	3	1	2	3	2	4	3	2	1		1	1	0	1	1	0	1	0	1	0	1	1	0	0	0	1	1	1	0	1	0	1	1	0	1	1	1	1	1	1	1	1	1	1	1	3	3
1	4	1	4	1	3	3	5	4	3	2	1		1	1	1	1	1	1	1	1	1	1	1	1	0	0	1	1	1	0	0	1	0	1	1	1	0	1	1	1	1	1	0	1	1	1	0	3	3
1	2	5	3	1	3	3	3	4	3	2	2	6	1	1	0	0	0	0	1	1	0	0	0	1	0	0	0	1	1	0	1	0	0	0	1	1	1	0	0	1	1	0	1	0	1	1	1	3	3
1	2	1	4	1	3	2	3	1	3	2	1		2	1	0	1	1	1	1	1	1	1	1	1	1	1	1	1	0	1	1	1	0	1	0	0	1	1	1	1	1	1	1	1	1	1	0	3	3
1	2	1	4	1	3	3	2	3	1	2	2	4	1	1	0	1	1	0	1	0	1	1	1	0	1	1	1	1	1	1	1	1	1	1	1	1	1	1	1	1	1	1	1	1	1	1	1	3	3
1	2	1	4	1	3	3	1	4	2	2	2	3	1	1	1	0	0	1	1	0	0	1	1	1	0	1	1	0	1	1	1	1	1	0	1	1	1	1	1	0	1	0	1	1	1	1	1	3	3
1	2	1	4	3	3	3	4	3	3	2	1		2	1	1	1	1	1	1	0	1	1	1	1	0	1	0	1	1	1	1	1	0	1	1	1	1	1	1	1	1	1	1	1	1	1	1	3	3
2	2	1	5	1	3	3	2	4	1	2	2	5	2	2	1	1	1	1	1	0	1	1	0	0	0	1	1	0	0	1	1	1	0	1	0	0	1	1	1	1	1	1	1	1	1	1	0	3	3
[truncated: 17 more columns]
